1 **Efficacy of fecal sampling as a gut proxy in the study of chicken gut microbiota**

2

3 Wei Yan<sup>1</sup>, Jiangxia Zheng<sup>1</sup>, Chaoliang Wen<sup>1</sup>, Congliang Ji<sup>2</sup>, Dexiang Zhang<sup>2</sup>, Yonghua Chen<sup>2</sup>,

4 Congjiao Sun<sup>1,\*</sup> and Ning Yang<sup>1,\*</sup>

5 <sup>1</sup>National Engineering Laboratory for Animal Breeding and MOA Key Laboratory of Animal

6 Genetics and Breeding, College of Animal Science and Technology, China Agricultural University,

7 Beijing, 100193, China and <sup>2</sup>Wen's Nanfang Poultry Breeding Co. Ltd, Guangdong Province,

8 Yunfu, 527400, China.

9 \*Correspondence: [nyang@cau.edu.cn](mailto:nyang@cau.edu.cn) and [cjsun@cau.edu.cn](mailto:cjsun@cau.edu.cn)

10

11 **Abstract**

12 **Background:** Despite the convenience and noninvasiveness of fecal sampling, the fecal  
13 microbiota does not fully represent that of the gastrointestinal (GI) tract, and the efficacy of fecal  
14 sampling to accurately represent the gut microbiota in birds is poorly understood. In this study, we  
15 aim to identify the efficacy of feces as a gut proxy in birds using chickens as a model. We  
16 collected 1,026 samples from 206 chickens, including duodenum, jejunum, ileum, cecum and  
17 feces samples, for 16S rRNA amplicon sequencing analyses.

18 **Results:** In this study, the efficacy of feces as a gut proxy was partitioned to microbial community  
19 membership and community structure. Most taxa in the small intestine (84.11 – 87.28%) and ceca  
20 (99.39%) could be identified in feces. Microbial community membership was reflected with a gut  
21 anatomic feature, but community structure was not. Excluding shared microbes, the small intestine  
22 and ceca contributed 34.12 and 5.83% of the total fecal members, respectively. The composition  
23 of Firmicutes members in the small intestine and that of Actinobacteria, Bacteroidetes, Firmicutes  
24 and Proteobacteria members in the ceca could be well mirrored by the observations in fecal  
25 samples ( $\rho = 0.54 - 0.71$  and  $0.71 - 0.78$ , respectively,  $P < 0.001$ ). However, there were few  
26 significant correlations for each genus between feces and each of the 4 gut segments, and these  
27 correlations were not high ( $\rho = -0.2 - 0.4$ ,  $P < 0.05$ ) for most genera.

28 **Conclusions:** Our results provide evidence that the good potential of feces to identify most taxa in  
29 chicken guts, but it should be interpreted with caution by using feces as a proxy for gut in  
30 microbial structure analyses. This work provides insights and future directions regarding the usage  
31 of fecal samples in studies of the gut microbiome.

32 **Keywords:** gut microbiota, feces, proxy, spatial relationships, chicken

### 33 **Background**

34 Many studies have reported the important roles of gut microbiota in host metabolism and health in  
35 humans [1], other mammals [2] and birds [3]. Because of the convenience and noninvasiveness of  
36 fecal sampling, most studies use fecal samples as a proxy to study the gut microbiota, despite the  
37 increasing recognition that fecal microbial populations may not be fully representative of those in  
38 the contents or mucosa of the gastrointestinal (GI) tract [4, 5]. Therefore, a comprehensive  
39 understanding of the efficacy of using fecal samples as a proxy to study the GI microbiota would  
40 help improve longitudinal analyses of microbiota and the application of fecal samples [6, 7].

41 Among birds, the chicken is frequently used as a research model, and its GI microbiota has been  
42 studied previously [8-12]. In several studies, the microbiota present in different GI segments have  
43 been investigated using traditional sequencing methods [13] or high-throughput sequencing  
44 techniques [14, 15]. However, these studies had small sample sizes ( $N = 3 - 8$ ), were primarily  
45 aimed at examining the spatial heterogeneity among different segments and did not focus on the  
46 spatial microbiota relationships between feces and the GI tract.

47 Compared with most mammals, the cecum in birds has been reported to play important roles in  
48 metabolism, such as in the digestion of cellulose, starch and other resistant polysaccharides [16,  
49 17] and in the absorption of nutrients [18] and water [19]. Microbial compositions and functions in  
50 chicken ceca have been reported in many studies [20, 21]. In addition, Stanley et al. [22] examined  
51 the microbial relationships between the ceca and feces and observed that 88.55% of all operational  
52 taxonomic units (OTUs) were shared. However, the microbial relationships between the ceca and  
53 small intestine (including the duodenum, jejunum and ileum), which would help provide an  
54 integrated view of gut microbial relationships, were rarely reported.

55        Here, we performed large-scale sequencing surveys and focused on the efficacy of using feces  
56        to represent the GI microbiota in chickens. The efficacy was partitioned into microbial community  
57        membership and structure to gain a comprehensive view to improve our understanding of the  
58        efficacy of the use of feces as a proxy to study the gut microbiota and their spatial relationships in  
59        the gut.

60 **Results**

61 **Sequencing data**

62 The 16S rRNA gene-based sequencing from 206 chickens produced 62,193,309 reads, 58,959,487  
63 of which remained after quality filtration. The average number of sequences per sample was  
64 57,465 and the number of sequences per sample ranged from 22,321 to 224,188.

65

66 **Landscape and quantification of microbial relationships among feces, ceca and small**  
67 **intestine**

68 To gain an overview of the microbial relationships among the chicken duodenum, jejunum, ileum,  
69 ceca and feces, unweighted UniFrac distances (community membership; presence/absence of taxa)  
70 and weighted UniFrac distances (community structure; taking the relative abundances of taxa into  
71 account) were used to perform principal coordinates analysis (PCoA; Fig. 1A, B). The variation in  
72 community memberships among different sites were primarily explained by the sites origin (Fig.  
73 1A), but the community structures showed both the sites origin and interindividual variation (Fig.  
74 1B). In particular, the cecal microbial community exhibited a distant relationship with the small  
75 intestine community, and the microbial community in feces showed an intermediate relationship  
76 between those of the ceca and small intestines.

77 UniFrac distances between two samples from all assayed sites within each individual were  
78 calculated to quantify the spatial relationships of the gut microbiota. When the community  
79 membership was considered alone, the UniFrac distance decreased along the gut anatomical  
80 locations from the farthest to the nearest sites between fecal and duodenal, jejunal, ileal or cecal  
81 samples (FD, FJ, FI or FC, respectively, in Fig. 1C), presenting clear anatomical differences.

82 However, when taking the community structure into account, the UniFrac distance increased in FI  
83 and FC compared with that in FJ (Fig. 1D). This finding might be explained by the exchange of  
84 contents between the ileum and ceca, suggesting that the specific cecal microbial structure  
85 influences the microbial communities in the ileum and feces.

86 Among all pairs, the unweighted UniFrac distance between the cecal and duodenal as well as  
87 jejunum samples were highest ( $P < 0.05$ ), and that between duodenal and jejunal samples was  
88 lowest ( $P < 0.05$ ; Fig. 1C and Additional file 1-2: Table S1-S2). Regarding the weighted UniFrac  
89 distances, cecal samples had similar distances to the duodenal and jejunal samples, and these  
90 distances were greater than for the other pairs ( $P < 0.05$ ), whereas the lowest distance was  
91 observed between duodenal and jejunal samples ( $P < 0.1$ ; Fig. 1D and Additional file 1-2: Table  
92 S1-S2). These results suggest that limited differences exist within small intestinal microbial  
93 communities, while the microbial structure in the ceca is quite distinct from those in the small  
94 intestine.

95

#### 96 **Analyses of shared and exclusive microbial members**

97 Given that both community membership and structure influence the microbial relationships among  
98 the feces, ceca and small intestine, we next evaluated the extent to which the spatial relationships  
99 were influenced by the above two factors. The shared and exclusive OTUs were calculated to  
100 assess the influence of the microbial community membership. To decrease the data noise, only  
101 OTUs present in more than 3 samples at each sampling site were used to analyze the effect of  
102 microbial membership. We observed that 971 OTUs, accounting for 30.9% of the total OTUs,  
103 were shared across all sites (Fig. 2A), and these shared OTUs can be referred to as the “core”

104 microbiota in the gut. These OTUs represented different proportions of sequences in different sites  
105 and were especially high in fecal samples (96.50%; Fig. 2B), indicating that the most abundant  
106 members detected in fecal samples belonged to these “core” microbiota. At the genus level, these  
107 core taxa were primarily classified as *Bacteroides*, *Intestinibacter*, *Lactobacillus*, *Rikenellaceae*  
108 *RC9 gut group* and *Gallibacterium* (Additional file 3: Figure S1A). It is noteworthy that 5.88% of  
109 the “core” microbiota sequences were not assigned and that most of these sequences (71.40%)  
110 were detected in the cecal samples (small pie chart in Additional file 3: Figure S1A), suggesting  
111 that most of these unassigned taxa tended to be anaerobic microbes.

112 Most OTUs in the small intestine (84.11 – 87.28%) and cecal (99.39%) samples could be  
113 identified as fecal OTUs (Table 1), indicating that feces would be a good proxy for identifying  
114 species in the gut microbiota. However, some OTUs that were present in the GI tract (12.72 –  
115 15.89% in small intestinal and 0.61% in cecal samples) remained undetected in fecal samples  
116 (Table 1) and members of *Clostridiales*, *Rhizobiales*, *Xanthomonadales* and *Bacteroidales*  
117 appeared to be particularly undetected in feces (Additional file 4: Table S3).

118 Microbial communities in the small intestine and ceca did not contribute equally to the fecal  
119 microbial members, as 35.18% of fecal OTUs were not identified in cecal samples, most of which  
120 (34.12%) could be identified in small intestinal niches (Table 1, Fig. 2C). These OTUs were  
121 primarily from the orders *Clostridiales*, *Lactobacillales*, *Pseudomonadales*, *Rickettsiales* and so  
122 on (Additional file 3: Figure S1B) and were considered exclusive contributors of the small  
123 intestinal microbiota to fecal microbial members. The ceca exclusively contributed 5.83% of  
124 OTUs to the observed fecal members, representing 0.28% of the fecal sample sequences and  
125 consisting of taxa primarily from the orders *Bacteroidales*, *Rhizobiales*, *Clostridiales*,

126 *Micrococcales* and *Flavobacteriales* (Fig 2C and Additional file 3: Figure S1C).

127

### 128 **Correlation analyses of microbial abundances**

129 Because community structure also affects the spatial relationships of gut microbiota, we next  
130 performed Spearman correlation analyses between the mean fecal and segmental genera  
131 abundance to evaluate the effects of community structure and assess the extent to which the  
132 microbial community in the GI tract was reflected in the fecal samples (Fig. 3). If a high  
133 correlation was observed between two sites, the differences in abundance between sites were  
134 considered highly consistent, so that the abundance at one site had the potential to be a good proxy  
135 for the abundance at another. The microbial composition of feces was correlated with those in the  
136 small intestine (Spearman:  $\rho = 0.38$ ;  $P < 0.001$ ) and in the combination of small intestine and ceca  
137 ( $\rho = 0.48$ ;  $P < 0.001$ ; Fig. 3). We then performed similar analyses to identify the correlation bias in  
138 predominant phyla (Actinobacteria, Bacteroidetes, Firmicutes and Proteobacteria; Additional file 5:  
139 Figure S2). Genera of the Firmicutes and Proteobacteria phyla in fecal samples showed moderate  
140 to high correlations with those at all four GI sites ( $\rho = 0.40 - 0.76$ ,  $P < 0.001$ ). In particular, fecal  
141 samples were well representative of Firmicutes members in both the small intestine and ceca ( $\rho =$   
142  $0.54 - 0.71$ ,  $P < 0.001$ ) and of Actinobacteria, Bacteroidetes and Proteobacteria members in the  
143 ceca ( $\rho = 0.74 - 0.78$ ,  $P < 0.001$ ). However, Actinobacteria members in the small intestine might  
144 not be well represented in fecal samples ( $\rho = 0.13 - 0.22$ ,  $P > 0.05$ ).

145 A follow-up question concerned the extent to which each microbe correlated between two sites.  
146 To address this issue, Spearman correlation tests were performed for each genus between two sites.  
147 The genera with abundances over 0.1% at either compared site with a significant correlation ( $P <$



148 0.05) are summarized in Fig. 4 and Additional file 6: Table S4. Between the fecal and each of the 4  
149 gut segmental samples, a limited number of significant correlations ( $P < 0.05$ ) were observed, and  
150 these correlations were not high ( $\rho = -0.2 - 0.4$ ,  $P < 0.05$ ) for each genus. Most genera with  
151 significant correlations belonged to the phyla Firmicutes and Proteobacteria. However, more  
152 significant and moderate correlations were observed between two of the small intestinal segments,  
153 and most of the genera with significant correlations were also from the phyla Firmicutes and  
154 Proteobacteria (Additional file 6: Table S4). The results suggest that the gut microbiota structures  
155 could be moderately reflected by fecal samples when taking all genera into consideration  
156 simultaneously, but analyses of fluctuations in abundance for a specific genus should be  
157 interpreted with caution.

158 Although microbes at one site were weakly correlated with the corresponding microbes at  
159 another site, certain patterns were observed in some cases, as exemplified by the genus  
160 *Campylobacter* (Additional file 6: Table S4). The abundance of this genus in ceca exhibited  
161 consistent correlations with that observed in the jejunum ( $\rho = 0.21$ ,  $P < 0.05$ ) and ileum ( $\rho = 0.37$ ,  
162  $P < 0.05$ ). In ileal samples, this genus was correlated with that measured in fecal samples ( $\rho =$   
163  $0.19$ ,  $P < 0.05$ ), while no correlation was observed between cecal and fecal samples. This finding  
164 indicates that *Campylobacter* has great colonization ability in the distal gut of chickens, especially  
165 in ceca, and most *Campylobacter* contributions to the fecal composition are probably from the  
166 ileum, but not from the ceca.

167 **Discussion**

168 This study is a large-scale sequencing assessment of the efficacy of using fecal samples as a proxy  
169 for the gut microbiota in birds. In this study, we comprehensively examined the community  
170 membership and structure of the chicken gut microbiome at five different biogeographic sites  
171 within 206 individual animals. We showed that fecal samples were good proxies for detecting the  
172 presence/absence of GI microbial members because most GI tract members could be detected  
173 within anatomic features in fecal samples (microbial communities in feces showed increasing  
174 similarities to those in the GI tract along the duodenum-jejunum-ileum-ceca axis). However, phyla  
175 bias and interindividual effects were observed to affect the efficacy of using fecal samples to study  
176 GI microbial abundance.

177 We also should note that the next-generation sequencing (NGS) approach could not absolutely  
178 detect all microbes in the gut because of some limitations of NGS method [23, 24]. Some  
179 microbes that may be present at lower levels than the limit of detection. Therefore, some OTUs  
180 that were not detected in feces but were found in the small intestine or ceca probably exist but  
181 remain below the detection limit or filtration criteria.

182 Similar to the current study, a high proportion of shared OTUs has been previously observed  
183 between fecal and cecal samples in chickens [22]. Similarly, a study in house mice observed that  
184 93.3% of OTUs were shared between fecal and lower GI samples [25]. Another chicken study  
185 indicated that the GI origin is a primary determinant for the chicken fecal microbiota composition  
186 [26], supporting the high proportion of shared OTUs between feces and the four gut segments  
187 observed in the current study. These results indicate that fecal samples have good potential for  
188 identifying microbial members derived from the GI tract. However, another chicken study by Choi

189 et al. [14] observed low percentages of shared OTUs between segments. A major reason for the  
190 differences among studies might be the small sample size in Choi's study, which would increase  
191 the sensitivity of the results with respect to individual variation. Moreover, the presence/absence  
192 of microbial members in the GI tract was observed to be reflected by fecal samples in a given  
193 anatomical feature, i.e., fecal samples had more similarities in community membership to those in  
194 ileal and cecal samples than to those in duodenal and jejunal samples, consistent with previous  
195 reports in birds [15] and mammals [25, 27, 28].

196 As for microbial community structure, the efficacy of using fecal samples to represent the gut  
197 microbiota structure did not work as well as for community membership. First, the weighted  
198 UniFrac distances between feces and each of intestinal segments were significantly higher than the  
199 corresponding unweighted UniFrac distances (Additional file 7: Figure S3), suggesting that taking  
200 the abundance into account significantly increased the dissimilarity between feces and each of the  
201 GI segments. Second, the abundances of most taxa were significantly different between fecal and  
202 GI samples (Additional file 8: Table S5), consistent with previous studies [13, 15, 29]. Third, the  
203 correlations between the mean fecal and segmental genera abundances were moderate, similar to  
204 the results in rhesus macaques [30]. However, these correlations display bias among different  
205 phyla, i.e., different phyla in the GI tract are differentially mirrored by fecal samples. Fourth,  
206 significant correlations ( $P < 0.05$ ) of each microbe between fecal and segmental samples were low  
207 and rare, suggesting that the efficacy of using fecal samples to represent microbial abundance was  
208 affected by the interindividual effect. A similar effect has also been observed in humans [4].

209 Previous studies in humans [4, 31] and other mammals [30, 32] have also addressed the issue of  
210 whether fecal samples are good representatives for GI microbial analyses. Although the

211 conclusions may not be fully consistent, nearly all studies reached a consensus that microbial  
212 communities in fecal samples do not represent the whole GI microbiota. Studies in humans  
213 suggest that microbial communities in the duodenum and colon are not represented by those in  
214 feces because of the large differences in microbial profiles [31], and these studies emphasized the  
215 need to examine tissue biopsies in addition to fecal samples [5], proposing that standard forceps  
216 mucosal biopsy samples can represent bacterial populations [4]. Compared with human studies,  
217 studies in other mammals are more comprehensive because a larger number of gut segments can  
218 be involved in the analyses. Several studies in mice [25, 32] support the utility of fecal samples for  
219 studying the gut microbiota, because microbial communities in fecal samples were observed to be  
220 similar to those in the lower GI tract, which is supported by studies conducted in rhesus macaques  
221 [30], pigs [33] and equines [34].

222 Compared with previous studies, the strength of the current study lies in the following: 1) it  
223 involved the use of gut segments from the upper GI tract to the lower GI tract and feces, providing  
224 a relatively comprehensive view of the spatial relationships of the gut microbiota; 2) the microbial  
225 relationships were partitioned into two parts, i.e., microbial community membership and structure,  
226 providing multiangle observations to identify microbial relationships between feces and the GI  
227 tract; and 3) a massive number of individuals was sampled, which is significant for investigations  
228 of gut spatial relationships, as the sizes of most of the above studies did not exceed twenty. The  
229 considerable sample size would provide more comprehensive insights into exploring the utility of  
230 fecal samples in studies of the gut microbiota.

231 Because of the specific and significant roles in nutrition and health [17, 35], ceca have been  
232 widely investigated in birds [36, 37], especially chickens [20, 21, 38]. *Bacteroides* was observed

233 as the dominant taxa in our study (Additional file 3: Figure S1D) and in most other studies [39,  
234 40], although some reports observed a predominance of *Clostridiales* members in ceca [14, 41].  
235 Although the cecal microbial community may sometimes be linked to diet [36], the nearly  
236 consistent results across studies suggests that the cecal microbial community is stable. This  
237 finding might be due to ceca having a special blind-ended structure and being located in the lower  
238 GI tract, providing a stable and anaerobic environment for microbes and longer storage periods of  
239 the contents, in contrast to the rapid transit environment in the small intestine [42]. In addition to  
240 the microbial composition, Stanley et al. [22] also compared microbial differences and similarities  
241 between ceca and feces in chicken. They observed that 88.55% of all OTUs, containing 99.25% of  
242 all sequences, were shared by the ceca and feces, similar to the observations in the current study.  
243 These results indicate that except for some rare microbial members, most microbes in the ceca can  
244 be detected in fecal samples.

245 The microbial relationships between the ceca and small intestine have been rarely reported in  
246 birds. Choi et al. [14] compared the percentage of shared OTUs among ceca and three small  
247 intestinal sections but observed low percentages between segments (ranging from 1.2 to 2.9%,  
248 representing from 38.7 to 65.5% of sequences). The percentages reported in another study (60.2%  
249 for the duodenum, 50.5% for the jejunum and 43.5% for the ileum, which were calculated from  
250 Figure 3 in their article) were higher than those in Choi's study. In contrast, the results of Xiao's  
251 study presented an opposite trend from our findings, i.e., the percentages of shared OTUs in  
252 Xiao's study decreased from the duodenum to the jejunum and ileum, demonstrating a  
253 reversed-anatomical feature compared with the current study. These inconsistent results might be  
254 attributable to differences among species, diets or other environmental factors, but the small

255 sample size in Xiao's study may be an important reason for these inconsistencies.

256

## 257 **Conclusion**

258 Overall, we assessed the efficacy of using fecal samples to represent GI microbiota in birds and

259 analyzed potential factors affecting this efficacy. With highly shared microbial members, fecal

260 samples have the good potential to be used to detect most microbial species in the small intestine

261 and ceca with gut anatomical features. However, analyses of microbial structures using fecal

262 samples as the proxy for the gut in longitudinal microbial studies should be interpreted with

263 caution. This study attempts to identify the microbial relationships between feces and the intestine

264 in birds, which will help extend our understanding of the bird gut microbiota and provide future

265 directions regarding the usage of fecal samples in studies of the gut microbiome.

266 **Methods**

267 **Animal model**

268 The complete procedure was performed according to the guidelines established by the Animal  
269 Care and Use Committee of China Agricultural University (permit number: SYXK 2013-0013).

270 The slow-growing yellow broiler was used as the animal model in this study, and the birds were  
271 obtained from Wen's Nanfang Poultry Breeding Co., Ltd. in Guangdong Province of China. Two  
272 hundred and six birds with similar body weights were selected and raised on the ground with *ad*  
273 *libitum* feeding and nipple drinkers. The birds were fed a common maize-soybean-based diet  
274 throughout the duration of the experiment. No antibiotics were applied during the thirty-five days  
275 before sample collection. Because chickens are the largest population of birds on earth, the  
276 chicken was selected as a bird model for this investigation. The slow-growing yellow broiler has  
277 not been highly selected for production, making this breed of chicken closer to the ancestral birds.

278

279 **Sample collection**

280 Fresh fecal samples were collected from each bird as soon as excreta was discharged through the  
281 cloaca at 77 days of age with the average body weight was 2.32 kg. Next, all the birds were  
282 humanely euthanized by cervical dislocation and subsequently dissected. The contents and  
283 mucosal surfaces of the duodenum, jejunum, ileum and cecum were collected immediately after  
284 dissection. To ensure the consistency of samples among individuals, a 10-cm-long fixed section of  
285 the duodenum and jejunum, the whole ileum and a pair of ceca were selected for sampling from  
286 each bird. The contents and mucosa were mixed uniformly before collection. All samples were  
287 immediately placed in liquid nitrogen and then stored at -80°C. Both the intestinal contents and

288 mucosa were sampled based on the consideration that the microbes from both sources may  
289 contribute to host interactions with respect to nutrient metabolism and immunity [43].

290

#### 291 **DNA extraction and 16S rRNA gene sequencing**

292 DNA was extracted from intestinal and fecal samples using a QIAamp DNA stool mini kit  
293 (QIAGEN, cat#51504) [44] following the manufacturer's instructions. PCR amplification of the  
294 V4 region of the bacterial 16S rRNA gene was performed using the forward primer 520F  
295 (5'-AYTGGGYDTAAAGNG-3') and the reverse primer 802R  
296 (5'-TACNVGGGTATCTAATCC-3'). Sample-specific 7-bp barcodes were incorporated into the  
297 primers for multiplex sequencing. The PCR reactions contained 5 µl of Q5 reaction buffer (5×), 5  
298 µl of Q5 High-Fidelity GC buffer (5×), 0.25 µl of Q5 High-Fidelity DNA Polymerase (5 U/µl), 2  
299 µl of dNTPs (2.5 mM), 1 µl (10 µM) of each forward and reverse primer, 2 µl of DNA template,  
300 and 8.75 µl of ddH<sub>2</sub>O. Thermal cycling consisted of initial denaturation at 98°C for 2 min,  
301 followed by 25 cycles of denaturation at 98°C for 15 s, annealing at 55°C for 30 s, and extension  
302 at 72°C for 30 s, with a final extension at 72°C for 5 min. PCR amplicons were purified using  
303 Agencourt AMPure Beads (Beckman Coulter, Indianapolis, IN) and quantified using a PicoGreen  
304 dsDNA Assay kit (Invitrogen, Carlsbad, CA, USA). After the quantification step, amplicons were  
305 pooled in equal amounts, and 2 × 300 bp paired-end sequencing was performed using an Illumina  
306 MiSeq platform with the MiSeq Reagent kit v3 at Shanghai Personal Biotechnology Co., Ltd.  
307 (Shanghai, China). The raw data on which the conclusions of the manuscript rely have been  
308 deposited in the National Center for Biotechnology Information (NCBI) database (accession  
309 numbers SRP139192, SRP139193 and SRP139195).



310

311 **Analysis of sequencing data**

312 Data analysis was performed using the Quantitative Insights Into Microbial Ecology (QIIME,  
313 v1.8.0) pipeline [45], due to the advantages of QIIME [46-48]. Briefly, raw sequencing reads with  
314 exact matches to the barcodes were assigned to respective samples and identified as valid  
315 sequences. The low-quality sequences were filtered based on the following criteria [49, 50]: length  
316 < 150 bp, average Phred score < 20, ambiguous bases, and mononucleotide repeats > 8 bp.  
317 Paired-end reads were assembled using FLASH [51], and chimera detection was performed with  
318 QIIME. After quality control, four fecal samples were excluded due to low sequence quality that  
319 was potentially caused by a technical artifact. The remaining high-quality sequences were  
320 clustered into operational taxonomic units (OTUs) at a 97% sequence identity using an  
321 open-reference OTU picking protocol against the Silva database (SILVA128) [52-54].

322 We focused on open-reference OTU picking for these analyses because this method yields  
323 substantially more taxonomic identifications with sequences that failed to hit the reference  
324 database than do closed-reference methods [55]. The open-reference method can provide more  
325 information for comparisons among intestinal segments or feces. The singleton OTUs were  
326 discarded because such OTUs can occur due to sequencing errors. Only OTUs representing more  
327 than 0.001% of the total filtered OTUs were retained to improve the efficiency of the analysis.  
328 Because the sequencing and sampling quantity varied among individuals, we rarefied the data to  
329 the lowest numbers of sequences per sample to control for sampling effort in diversity analyses.  
330 Alpha and beta diversity of individual OTUs were calculated with postrarefaction data and the  
331 phylogenetic tree. Principal coordinate analysis (PCoA) was performed using the unweighted or

332 weighted UniFrac distance [56] for different intestinal segments and feces. To decrease the data  
333 noise, only OTUs that were present in more than 3 samples at each sampling site were used to  
334 analyze the effect of microbial membership. The correlations between the mean fecal and  
335 segmental genera abundance were calculated using the method described in a study of rhesus  
336 macaques [30]. These methods could primarily provide the number and diversity of microbes in  
337 feces and each segment which would help to quantitatively understand the relationships of  
338 microbial communities between feces and GI tract.

339

#### 340 **Statistical analysis**

341 Venn plots were generated for intestinal segment or feces samples at the OTU level using the  
342 VennDiagram package in **R**. Spearman correlation analysis was performed in package psych in **R**.  
343 Paired Student's *t*-test was used to compare the microbial UniFrac distance between two sampling  
344 sites. Mann-Whitney test was performed to identify the differences of each genus between two  
345 sampling sites.

346

347

#### 348 **Abbreviations**

349 GI: Gastrointestinal; FD, FJ, FI and FC: The unweighted or weighted UniFrac distance between  
350 feces and duodenum, jejunum, ileum or cecum, respectively; NGS: Next-generation sequencing;  
351 OTU: Operational taxonomic unit.

352 **Declarations**

353 *Ethics approval and consent to participate*

354 The complete procedure was performed according to the guidelines established by the Animal  
355 Care and Use Committee of China Agricultural University (permit number: SYXK 2013-0013).

356

357 *Consent for publication*

358 Not applicable

359

360 *Availability of data and material*

361 The raw data on which the conclusions of the manuscript rely has been deposited in the National  
362 Center for Biotechnology Information (NCBI) database (accession number SRP139192,  
363 SRP139193 and SRP139195).

364

365 *Competing interests*

366 The authors declare no conflicts of interest.

367

368 *Funding*

369 The current study was funded in part by Programs for Changjiang Scholars and Innovative  
370 Research in University (IRT\_15R62) and China Agriculture Research System (CARS-40).

371

372 *Authors' contributions*

373 WY, JXZ and NY designed the study. WY, JXZ, CLW, CLJ, DXZ, YHC and CJS collected the

374 samples. WY analyzed the data and wrote the manuscript. CLW assisted in construction of the  
375 figures. CJS and NY assisted in data analyzing and contributed to the revisions. All authors read  
376 and approved the final manuscript.

377

378 *Acknowledgements*

379 We thank Prof. Guiyun Xu for demonstration of dissection; Guangqi Li, Zhongyi Duan, Shanshan  
380 Xie, Jingwei Yuan, Dehe Wang, Zebin Zhang, Xingzheng Li, Yajie Li, Chunming Mai and Zhenfei  
381 Jiang for assistance with the sample collection; and Dr. Zhengsheng Xue for advice on the study.  
382 The current study was funded in part by Programs for Changjiang Scholars and Innovative  
383 Research in University (IRT\_15R62) and China Agriculture Research System (CARS-40).

384

385 **References**

- 386 1. Rosenbaum M, Knight R, Leibel RL: The gut microbiota in human energy homeostasis and obesity.  
387 Trends Endocrinol Metab. 2015; 26:493-501.
- 388 2. Shin NR, Lee JC, Lee HY, Kim MS, Whon TW, Lee MS, Bae JW: An increase in the *Akkermansia*  
389 spp. population induced by metformin treatment improves glucose homeostasis in diet-induced  
390 obese mice. Gut. 2014; 63:727-35.
- 391 3. Brisbin JT, Gong J, Sharif S: Interactions between commensal bacteria and the gut-associated  
392 immune system of the chicken. Anim Health Res Rev. 2008; 9:101-10.
- 393 4. Lavelle A, Lennon G, O'Sullivan O, Docherty N, Balfé A, Maguire A, Mulcahy HE, Doherty G,  
394 O'Donoghue D, Hyland J et al: Spatial variation of the colonic microbiota in patients with ulcerative  
395 colitis and control volunteers. Gut. 2015; 64:1553-61.
- 396 5. Gevers D, Kugathasan S, Denson LA, Vázquezbaeza Y, Van TW, Ren B, Schwager E, Knights D,  
397 Song SJ, Yassour M: The treatment-naive microbiome in new-onset Crohn's disease. Cell Host  
398 Microbe. 2014; 15:382-92.
- 399 6. McCormack UM, Curiã O T, Buzoianu SG, Prieto ML, Ryan T, Varley P, Crispie F, Magowan E,  
400 Metzler-Zebeli BU, Berry D: Exploring a possible link between the intestinal microbiota and feed  
401 efficiency in pigs. Appl Environ Microbiol. 2017; 83: e00380-17.
- 402 7. Johnson TJ, Youmans BP, Noll S, Cardona C, Evans NP, Karnezos TP, Ngunjiri JM, Abundo MC,  
403 Lee CW: A consistent and predictable commercial broiler chicken bacterial microbiota in  
404 antibiotic-free production displays strong correlations with performance. Appl Environ Microbiol.  
405 2018; 84:e00362-18.

- 406 8. Dumonceaux TJ, Hill JE, Hemmingsen SM, Van Kessel AG: Characterization of intestinal  
407 microbiota and response to dietary virginiamycin supplementation in the broiler chicken. *Appl*  
408 *Environ Microbiol.* 2006; 72:2815-23.
- 409 9. Yeoman CJ, Chia N, Jeraldo P, Sipos M, Goldenfeld ND, White BA: The microbiome of the  
410 chicken gastrointestinal tract. *Anim Health Res Rev.* 2012; 13:89-99.
- 411 10. Stanley D, Hughes RJ, Moore RJ: Microbiota of the chicken gastrointestinal tract: influence on  
412 health, productivity and disease. *Appl Microbiol Biotechnol.* 2014; 98:4301-10.
- 413 11. Shaufi MAM, Sieo CC, Chong CW, Gan HM, Ho YW: Deciphering chicken gut microbial  
414 dynamics based on high-throughput 16S rRNA metagenomics analyses. *Gut Pathog.* 2015; 7:4.
- 415 12. Clavijo V, Mjv F: The gastrointestinal microbiome and its association with the control of pathogens  
416 in broiler chicken production: A review. *Poult Sci.* 2018; 97:1006-21.
- 417 13. Gong J, Si W, Forster R, Huang R, Yu H, Yin Y, Yang CY: 16S rRNA gene-based analysis of  
418 mucosa-associated bacterial community and phylogeny in the chicken gastrointestinal tracts: from  
419 crops to ceca. *FEMS Microbiol Ecol.* 2007; 59:147-57.
- 420 14. Choi JH, Kim GB, Cha CJ: Spatial heterogeneity and stability of bacterial community in the  
421 gastrointestinal tracts of broiler chickens. *Poult Sci.* 2014; 93:1942-50.
- 422 15. Xiao Y, Xiang Y, Zhou W, Chen J, Li K, Yang H: Microbial community mapping in intestinal tract  
423 of broiler chicken. *Poult Sci.* 2016; 96:1387-93.
- 424 16. Mead GC: Microbes of the avian cecum: types present and substrates utilized. *J Exp Zool Suppl.*  
425 1989; 252:48-54.
- 426 17. Clench MH, Mathias JR: The avian cecum: A review. *Wilson Bulletin.* 1995; 107:93-121.
- 427 18. Obst BS, Diamond JM: Interspecific variation in sugar and amino acid transport by the avian cecum.

- 428 J Exp Zool Suppl. 1989; 252:117-26.
- 429 19. Gasaway WC, White RG, Dan FH: Digestion of dry matter and absorption of water in the intestine  
430 and cecum of rock ptarmigan. *Condor*. 1976; 78:77-84.
- 431 20. Stanley D, Geier MS, Hughes RJ, Denman SE, Moore RJ: Highly variable microbiota development  
432 in the chicken gastrointestinal tract. *PLoS One*. 2013; 8:e84290.
- 433 21. Sergeant MJ, Constantinidou C, Cogan TA, Bedford MR, Penn CW, Pallen MJ: Extensive  
434 microbial and functional diversity within the chicken cecal microbiome. *PLoS One*. 2014;  
435 9:e91941.
- 436 22. Stanley D, Geier MS, Chen H, Hughes RJ, Moore RJ: Comparison of fecal and cecal microbiotas  
437 reveals qualitative similarities but quantitative differences. *BMC Microbiol*. 2015; 15:51.
- 438 23. Rizzo JM, Buck MJ: Key principles and clinical applications of "next-generation" DNA sequencing.  
439 *Cancer Prev Res*. 2012; 5:887-900.
- 440 24. Daber R, Sukhadia S, Morrissette JJ: Understanding the limitations of next generation sequencing  
441 informatics, an approach to clinical pipeline validation using artificial data sets. *Cancer Genet*. 2013;  
442 206:441-8.
- 443 25. Suzuki TA, Nachman MW: Spatial heterogeneity of gut microbial composition along the  
444 gastrointestinal tract in natural populations of house mice. *PLoS One*. 2016; 11:e163720.
- 445 26. Sekelja M, Rud I, Knutsen SH, Denstadli V, Westereng B, Næs T, Rudi K: Abrupt temporal  
446 fluctuations in the chicken fecal microbiota are explained by its gastrointestinal origin. *Appl*  
447 *Environ Microbiol*. 2012; 78:2941-8.
- 448 27. Gu S, Chen D, Zhang JN, Lv X, Wang K, Duan LP, Nie Y, Wu XL: Bacterial community mapping  
449 of the mouse gastrointestinal tract. *PLoS One*. 2013; 8:e74957.

- 450 28. Dias J, Marcondes MI, Motta DSS, Cardoso DMB, Noronha MF, Resende RT, Machado FS,  
451 Mantovani HC, Dill-Mcfarland KA, Suen G: Bacterial community dynamics across the  
452 gastrointestinal tracts of dairy calves during preweaning development. *Appl Environ Microbiol.*  
453 2018; 84:e02675-17.
- 454 29. Yan W, Sun C, Yuan J, Yang N: Gut metagenomic analysis reveals prominent roles of  
455 *Lactobacillus* and cecal microbiota in chicken feed efficiency. *Sci Rep.* 2017; 7:45308.
- 456 30. Yasuda, Koji, Keunyoung, Ren, Boyu, Nbsp T, Franzosa: Biogeography of the intestinal mucosal  
457 and lumenal microbiome in the rhesus macaque. *Cell Host Microbe.* 2015; 17:385-91.
- 458 31. Stearns JC, Lynch MDJ, Senadheera DB, Tenenbaum HC, Goldberg MB, Cvitkovitch DG, Croitoru  
459 K, Morenohagelsieb G, Neufeld JD: Bacterial biogeography of the human digestive tract. *Sci Rep.*  
460 2011; 1:170.
- 461 32. Li D, Chen H, Mao B, Yang Q, Zhao J, Gu Z, Zhang H, Chen YQ, Chen W: Microbial  
462 biogeography and core microbiota of the rat digestive tract. *Sci Rep.* 2017; 8:45840.
- 463 33. Zhao W, Wang Y, Liu S, Huang J, Zhai Z, He C, Ding J, Wang J, Wang H, Fan W et al: The  
464 dynamic distribution of porcine microbiota across different ages and gastrointestinal tract segments.  
465 *PLoS One.* 2015; 10:e117441.
- 466 34. Ericsson AC, Johnson PJ, Lopes MA, Perry SC, Lanter HR: A microbiological map of the healthy  
467 equine gastrointestinal tract. *PLoS One.* 2016; 11:e166523.
- 468 35. Waite DW, Taylor MW: Characterizing the avian gut microbiota: membership, driving influences,  
469 and potential function. *Front Microbiol.* 2014; 5:223.
- 470 36. Wienemann T, Schmitt-Wagner D, Meuser K, Segelbacher G, Schink B, Brune A, Berthold P: The  
471 bacterial microbiota in the ceca of Capercaillie (*Tetrao urogallus*) differs between wild and captive



- 472 birds. *Syst Appl Microbiol.* 2011; 34:542-51.
- 473 37. Matsui H, Kato Y, Chikaraishi T, Moritani M, Bantokuda T, Wakita M: Microbial diversity in  
474 ostrich ceca as revealed by 16S ribosomal RNA gene clone library and detection of novel  
475 *Fibrobacter* species. *Anaerobe.* 2010; 16:83-93.
- 476 38. Oakley BB, Lillehoj HS, Kogut MH, Kim WK, Maurer JJ, Pedroso A, Lee MD, Collett SR,  
477 Johnson TJ, Cox NA: The chicken gastrointestinal microbiome. *FEMS Microbiol. Lett.* 2014;  
478 360:100-12.
- 479 39. Wei S, Morrison M, Yu Z: Bacterial census of poultry intestinal microbiome. *Poult Sci.* 2013;  
480 92:671-83.
- 481 40. Tillman GE, Haas GJ, Wise MG, Oakley B, Smith MA, Siragusa GR: Chicken intestine microbiota  
482 following the administration of lupulone, a hop-based antimicrobial. *FEMS Microbiol Ecol.* 2011;  
483 77:395-403.
- 484 41. Cressman MD, Yu Z, Nelson MC, Moeller SJ, Lilburn MS, Zerby HN: Interrelations between the  
485 microbiotas in the litter and in the intestines of commercial broiler chickens. *Appl Environ*  
486 *Microbiol.* 2010; 76:6572-82.
- 487 42. Clench MH, Mathias JR: A complex avian intestinal motility response to fasting. *Am J Physiol.*  
488 1992; 262:498-504.
- 489 43. Smith CC, Snowberg LK, Gregory CJ, Knight R, Bolnick DI: Dietary input of microbes and host  
490 genetic variation shape among-population differences in stickleback gut microbiota. *ISME J.* 2015;  
491 9:2515-26.
- 492 44. Zhao LL, Wang G, Siegel P, He C, Wang HZ, Zhao WJ, Zhai ZX, Tian FW, Zhao JX, Zhang H et  
493 al: Quantitative genetic background of the host influences gut microbiomes in chickens. *Sci Rep.*

- 494 2013; 3:1163.
- 495 45. Caporaso JG, Kuczynski J, Stombaugh J, Bittinger K, Bushman FD, Costello EK, Fierer N, Peña  
496 AG, Goodrich JK, Gordon JI: QIIME allows analysis of high-throughput community sequencing  
497 data. *Nat Methods*. 2010; 7:335-6.
- 498 46. Nilakanta H, Drews KL, Firrell S, Foulkes MA, Jablonski KA: A review of software for analyzing  
499 molecular sequences. *BMC Res Notes*. 2014; 7:830.
- 500 47. Plummer E, Twin J: A comparison of three bioinformatics pipelines for the analysis of preterm gut  
501 microbiota using 16S rRNA gene sequencing data. *J Proteomics Bioinformatics*. 2015; 8:283-91.
- 502 48. Pollock J, Glendinning L, Wisedchanwet T, Watson M: The madness of microbiome: attempting to  
503 find consensus "best practice" for 16S microbiome studies. *Appl Environ Microbiol*. 2018;  
504 84:e02627-17.
- 505 49. Gill SR, Pop M, Deboy RT, Eckburg PB, Turnbaugh PJ, Samuel BS, Gordon JI, Relman DA,  
506 Fraserliggett CM, Nelson KE: Metagenomic analysis of the human distal gut microbiome. *Science*.  
507 2006; 312:1355-9.
- 508 50. Chen H, Jiang W: Application of high-throughput sequencing in understanding human oral  
509 microbiome related with health and disease. *Front Microbiol*. 2014; 5:508.
- 510 51. Magoč T, Salzberg SL: FLASH: fast length adjustment of short reads to improve genome  
511 assemblies. *Bioinformatics*. 2011; 27:2957-63.
- 512 52. Quast C, Pruesse E, Yilmaz P, Gerken J, Schweer T, Yarza P, Peplies J, Glöckner FO: The SILVA  
513 ribosomal RNA gene database project: improved data processing and web-based tools. *Nucleic  
514 Acids Res*. 2013; 41:D590-6.
- 515 53. Yilmaz P, Parfrey L, Yarza P, Gerken J, Pruesse E, Quast C, Schweer T, Peplies J, Ludwig W,

- 516 Glöckner F: The SILVA and "All-species Living Tree Project (LTP)" taxonomic frameworks.  
517 Nucleic Acids Res. 2014; 42:D643-8.
- 518 54. Balvočiūtė M, Huson DH: SILVA, RDP, Greengenes, NCBI and OTT — how do these  
519 taxonomies compare? BMC Genomics. 2017; 18(S2):114.
- 520 55. Rideout JR, He Y, Navasmolina JA, Walters WA, Ursell LK, Gibbons SM, Chase J, McDonald D,  
521 Gonzalez A, Robbinspianka A: Subsampled open-reference clustering creates consistent,  
522 comprehensive OTU definitions and scales to billions of sequences. PeerJ. 2014; 2:e545.
- 523 56. Lozupone C, Knight R: UniFrac: a new phylogenetic method for comparing microbial communities.  
524 Appl Environ Microbiol. 2005; 71:8228-35.  
525

526 **Figure Legends**

527 **Fig. 1** Site origin and inter-individual effects on the shape of microbial community  
528 membership and structure. (A) Principal coordinates analysis (PCoA) with  
529 unweighted UniFrac distance. Each dot represents a sample from duodenum (D),  
530 jejunum (J), ileum (I), cecum (C) or feces (F). PC1 and PC2 represent the top two  
531 principal coordinates that captured the most variation, with the fraction of variation  
532 captured by that coordinate shown as a percent. (B) PCoA plot with weighted UniFrac  
533 distance, similar to (A). (C) Unweighted UniFrac distance (mean  $\pm$  SEM) between  
534 two sampling sites. DJ represents the UniFrac distance between the duodenal and  
535 jejunal microbial community, and it was the same as DI, JI, CD, CJ, CI, FD, FJ, FI  
536 and FC. Asterisks indicate the significance of the paired *t*-test: \*\*\*\**P* < 0.001, \*\**P* <  
537 0.01, \**P* < 0.05 and *P* < 0.1. (D) Weighted UniFrac distance between two sampling  
538 sites, similar to (C).

539

540 **Fig. 2** OTUs shared across different sampling sites. (A) Venn diagram demonstrating  
541 that the taxa overlap among different sampling sites. (B) The percentage of core  
542 OTUs and sequences represented by these OTUs in the duodenal (D), jejunal (J), ileal  
543 (I), cecal (C) and fecal (F) samples. (C) The percentage of OTUs in feces exclusively  
544 contributed by small intestine or cecum, and the percentage of OTUs in feces was  
545 below the limit of detection in the gastrointestinal tract.

546

547 **Fig. 3** Microbial compositions in feces mirror those in the gastrointestinal tract. Each

548 dot represents a genus. The average relative abundance of each genus in feces is  
549 transferred by negative logarithm and shown at x-axis. The average relative abundance of  
550 each genus in small intestine (SI) or intestine including small intestine and ceca (SI + C) is  
551 transferred by negative logarithm and shown at y-axis. Spearman's rho was calculated with the  
552 negative logarithm-transferred relative abundances between feces and SI (or SI + C).

553

554 **Fig. 4** Distribution of Spearman correlations for each genus between two sites. D, J, I,  
555 C and F denote the microbial communities of the duodenum, jejunum, ileum, cecum  
556 and feces, respectively. Only genera with an abundance > 0.1% at either site of  
557 comparison and significant correlations ( $P < 0.05$ ) are shown.

558

**Table 1** Shared and exclusive OTUs between two of sampling sites

| Site1          | Site2 | Shared OTUs        |             | Exclusive OTUs |             |
|----------------|-------|--------------------|-------------|----------------|-------------|
|                |       | In site1, %        | In site2, % | In site1, %    | In site2, % |
| D <sup>1</sup> | J     | 94.73 <sup>2</sup> | 93.83       | 5.27           | 6.17        |
|                |       | 99.86 <sup>3</sup> | 99.94       | 0.14           | 0.06        |
| D              | I     | 96.99              | 80.84       | 3.01           | 19.16       |
|                |       | 99.57              | 99.28       | 0.43           | 0.72        |
| J              | I     | 97.35              | 81.92       | 2.65           | 18.08       |
|                |       | 99.79              | 99.48       | 0.21           | 0.52        |
| C              | D     | 61.14              | 45.78       | 38.86          | 54.22       |
|                |       | 92.78              | 35.19       | 7.22           | 64.81       |
| C              | J     | 62.53              | 46.38       | 37.47          | 53.62       |
|                |       | 93.28              | 41.86       | 6.72           | 58.14       |
| C              | I     | 89.34              | 55.75       | 10.66          | 44.25       |
|                |       | 99.17              | 54.75       | 0.83           | 45.25       |
| F              | D     | 73.27              | 84.11       | 26.73          | 15.89       |
|                |       | 98.57              | 96.94       | 1.43           | 3.06        |
| F              | J     | 74.36              | 84.55       | 25.64          | 15.45       |
|                |       | 98.69              | 97.84       | 1.31           | 2.16        |
| F              | I     | 91.22              | 87.28       | 8.78           | 12.72       |
|                |       | 99.23              | 97.02       | 0.77           | 2.98        |
| F              | C     | 64.82              | 99.39       | 35.18          | 0.61        |
|                |       | 98.13              | 99.96       | 1.87           | 0.04        |

559 <sup>1</sup>D, J, I, C and F denotes the microbial community of duodenum, jejunum, ileum, cecum and feces,  
560 respectively. <sup>2</sup>The percentage of shared or exclusive OTUs; <sup>3</sup>The percentage of sequences shared  
561 or exclusive OTUs represent.

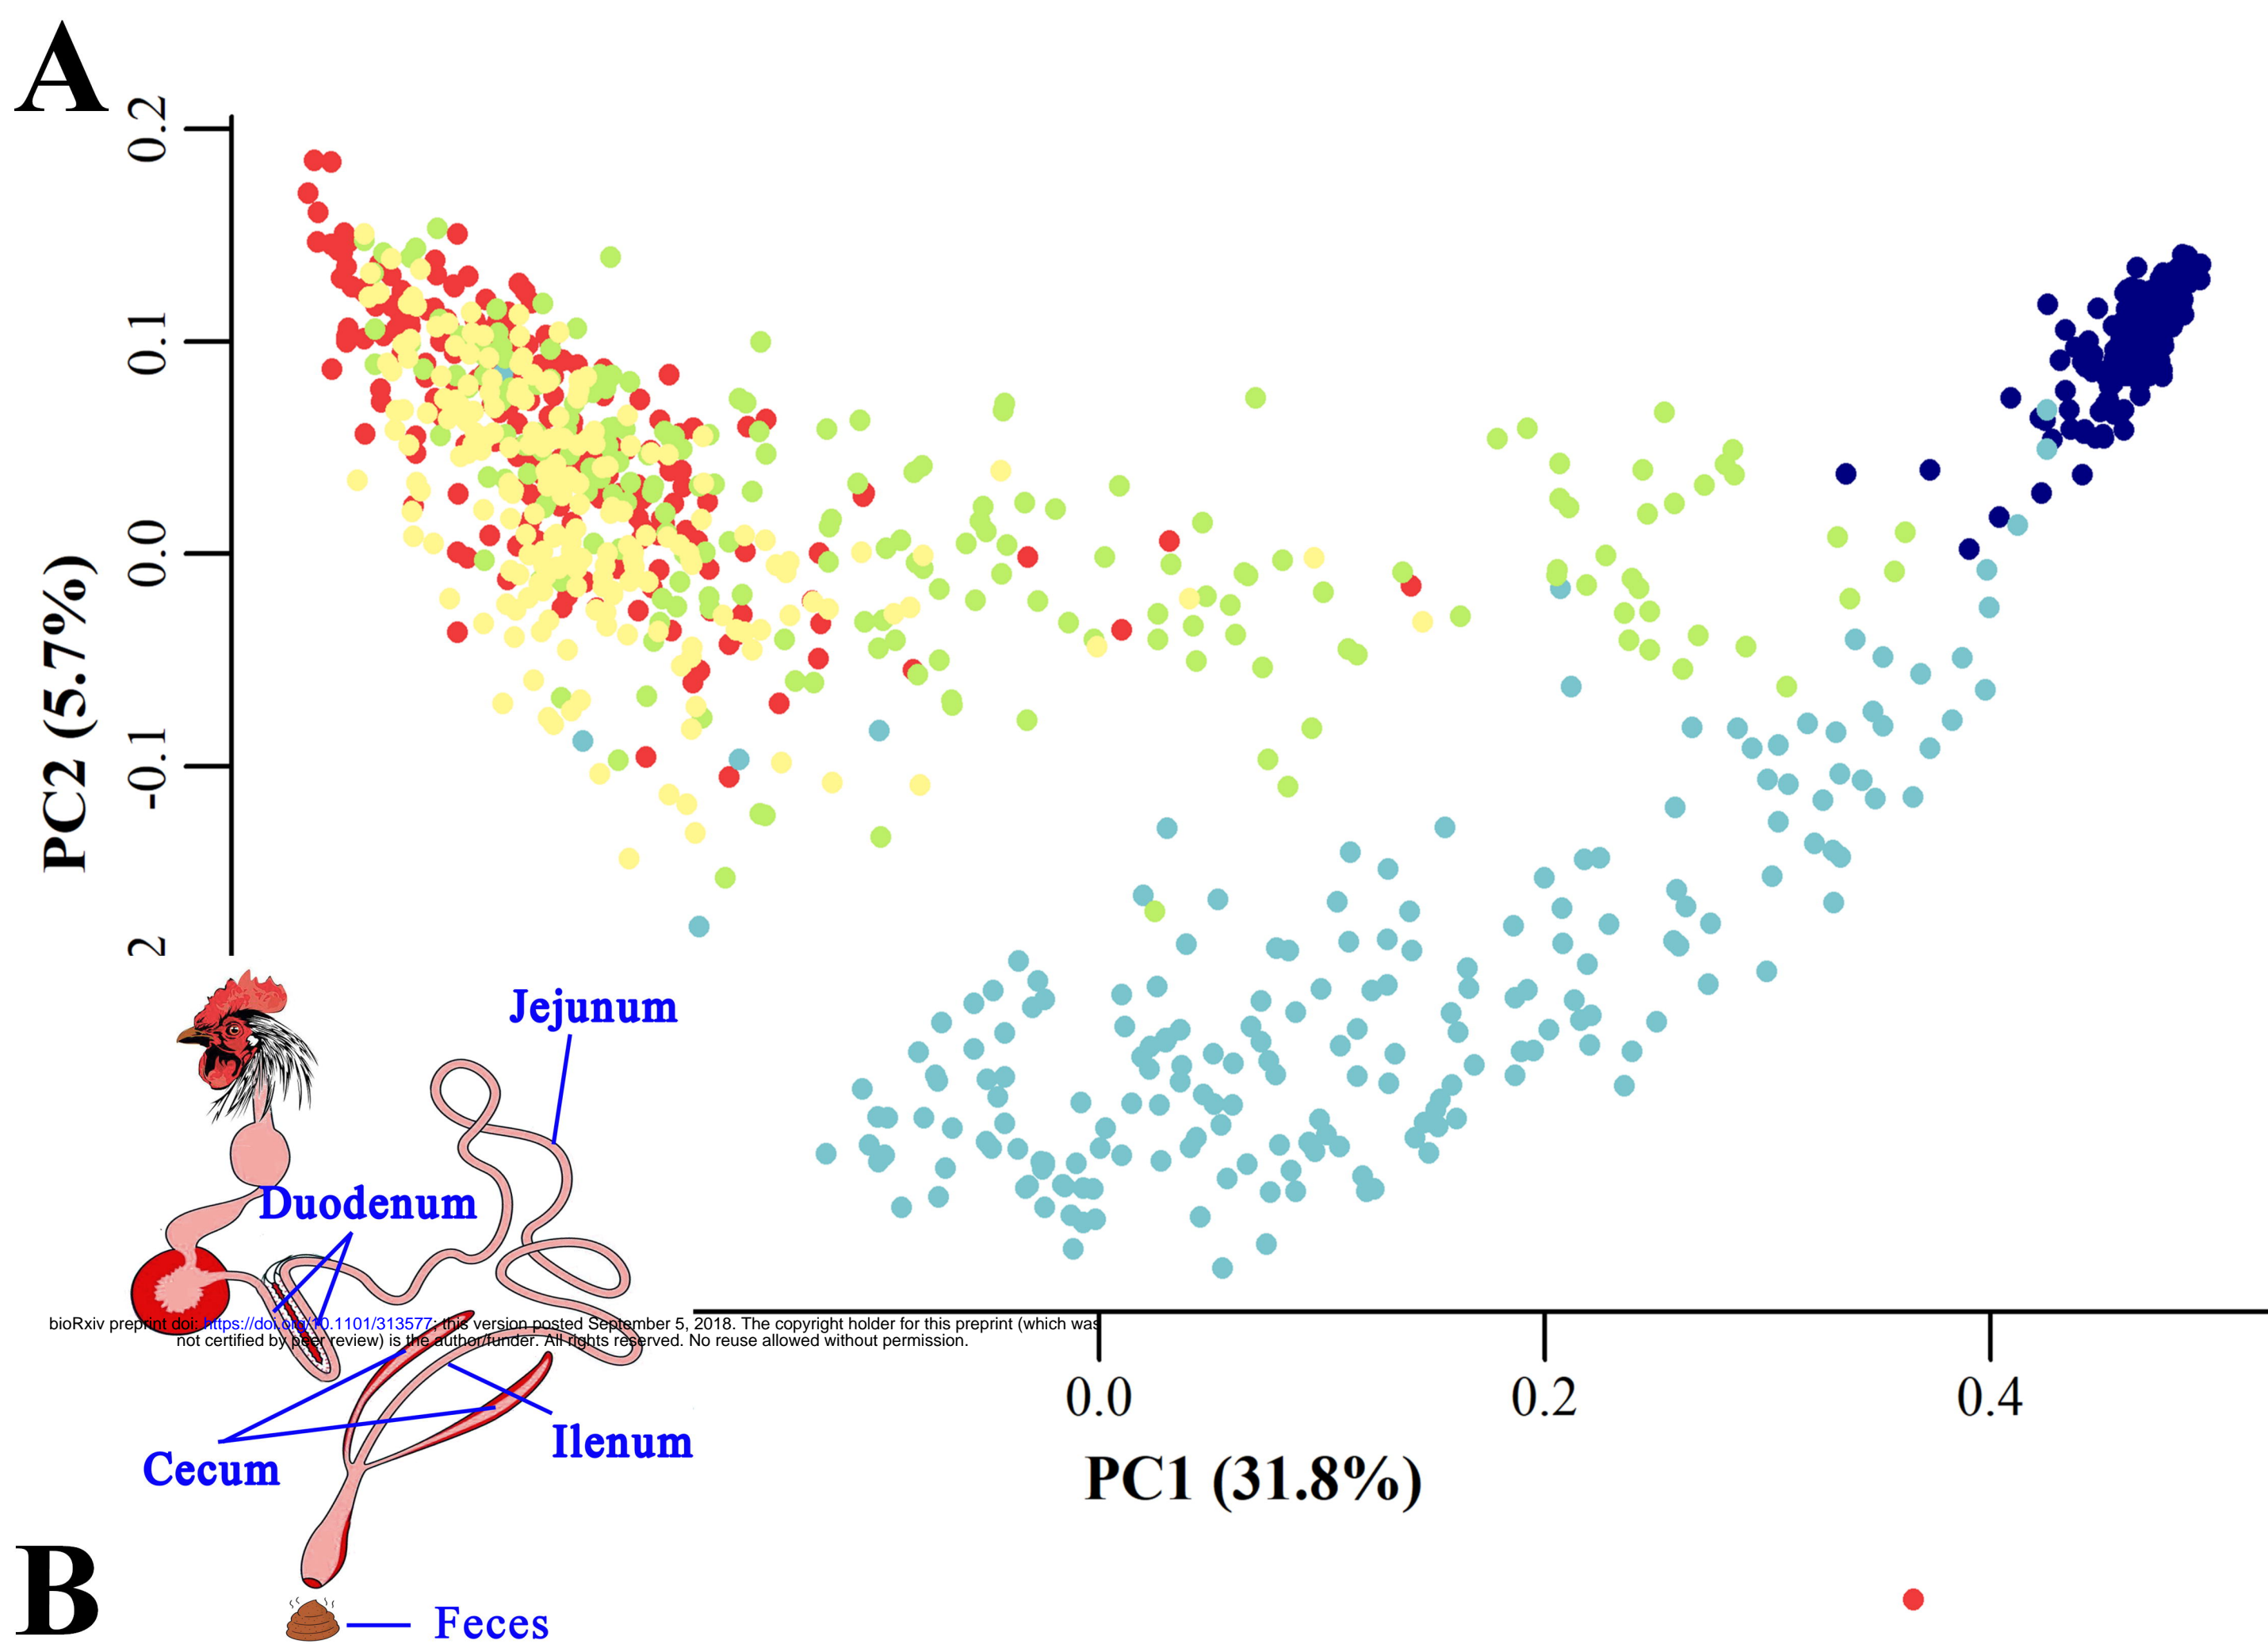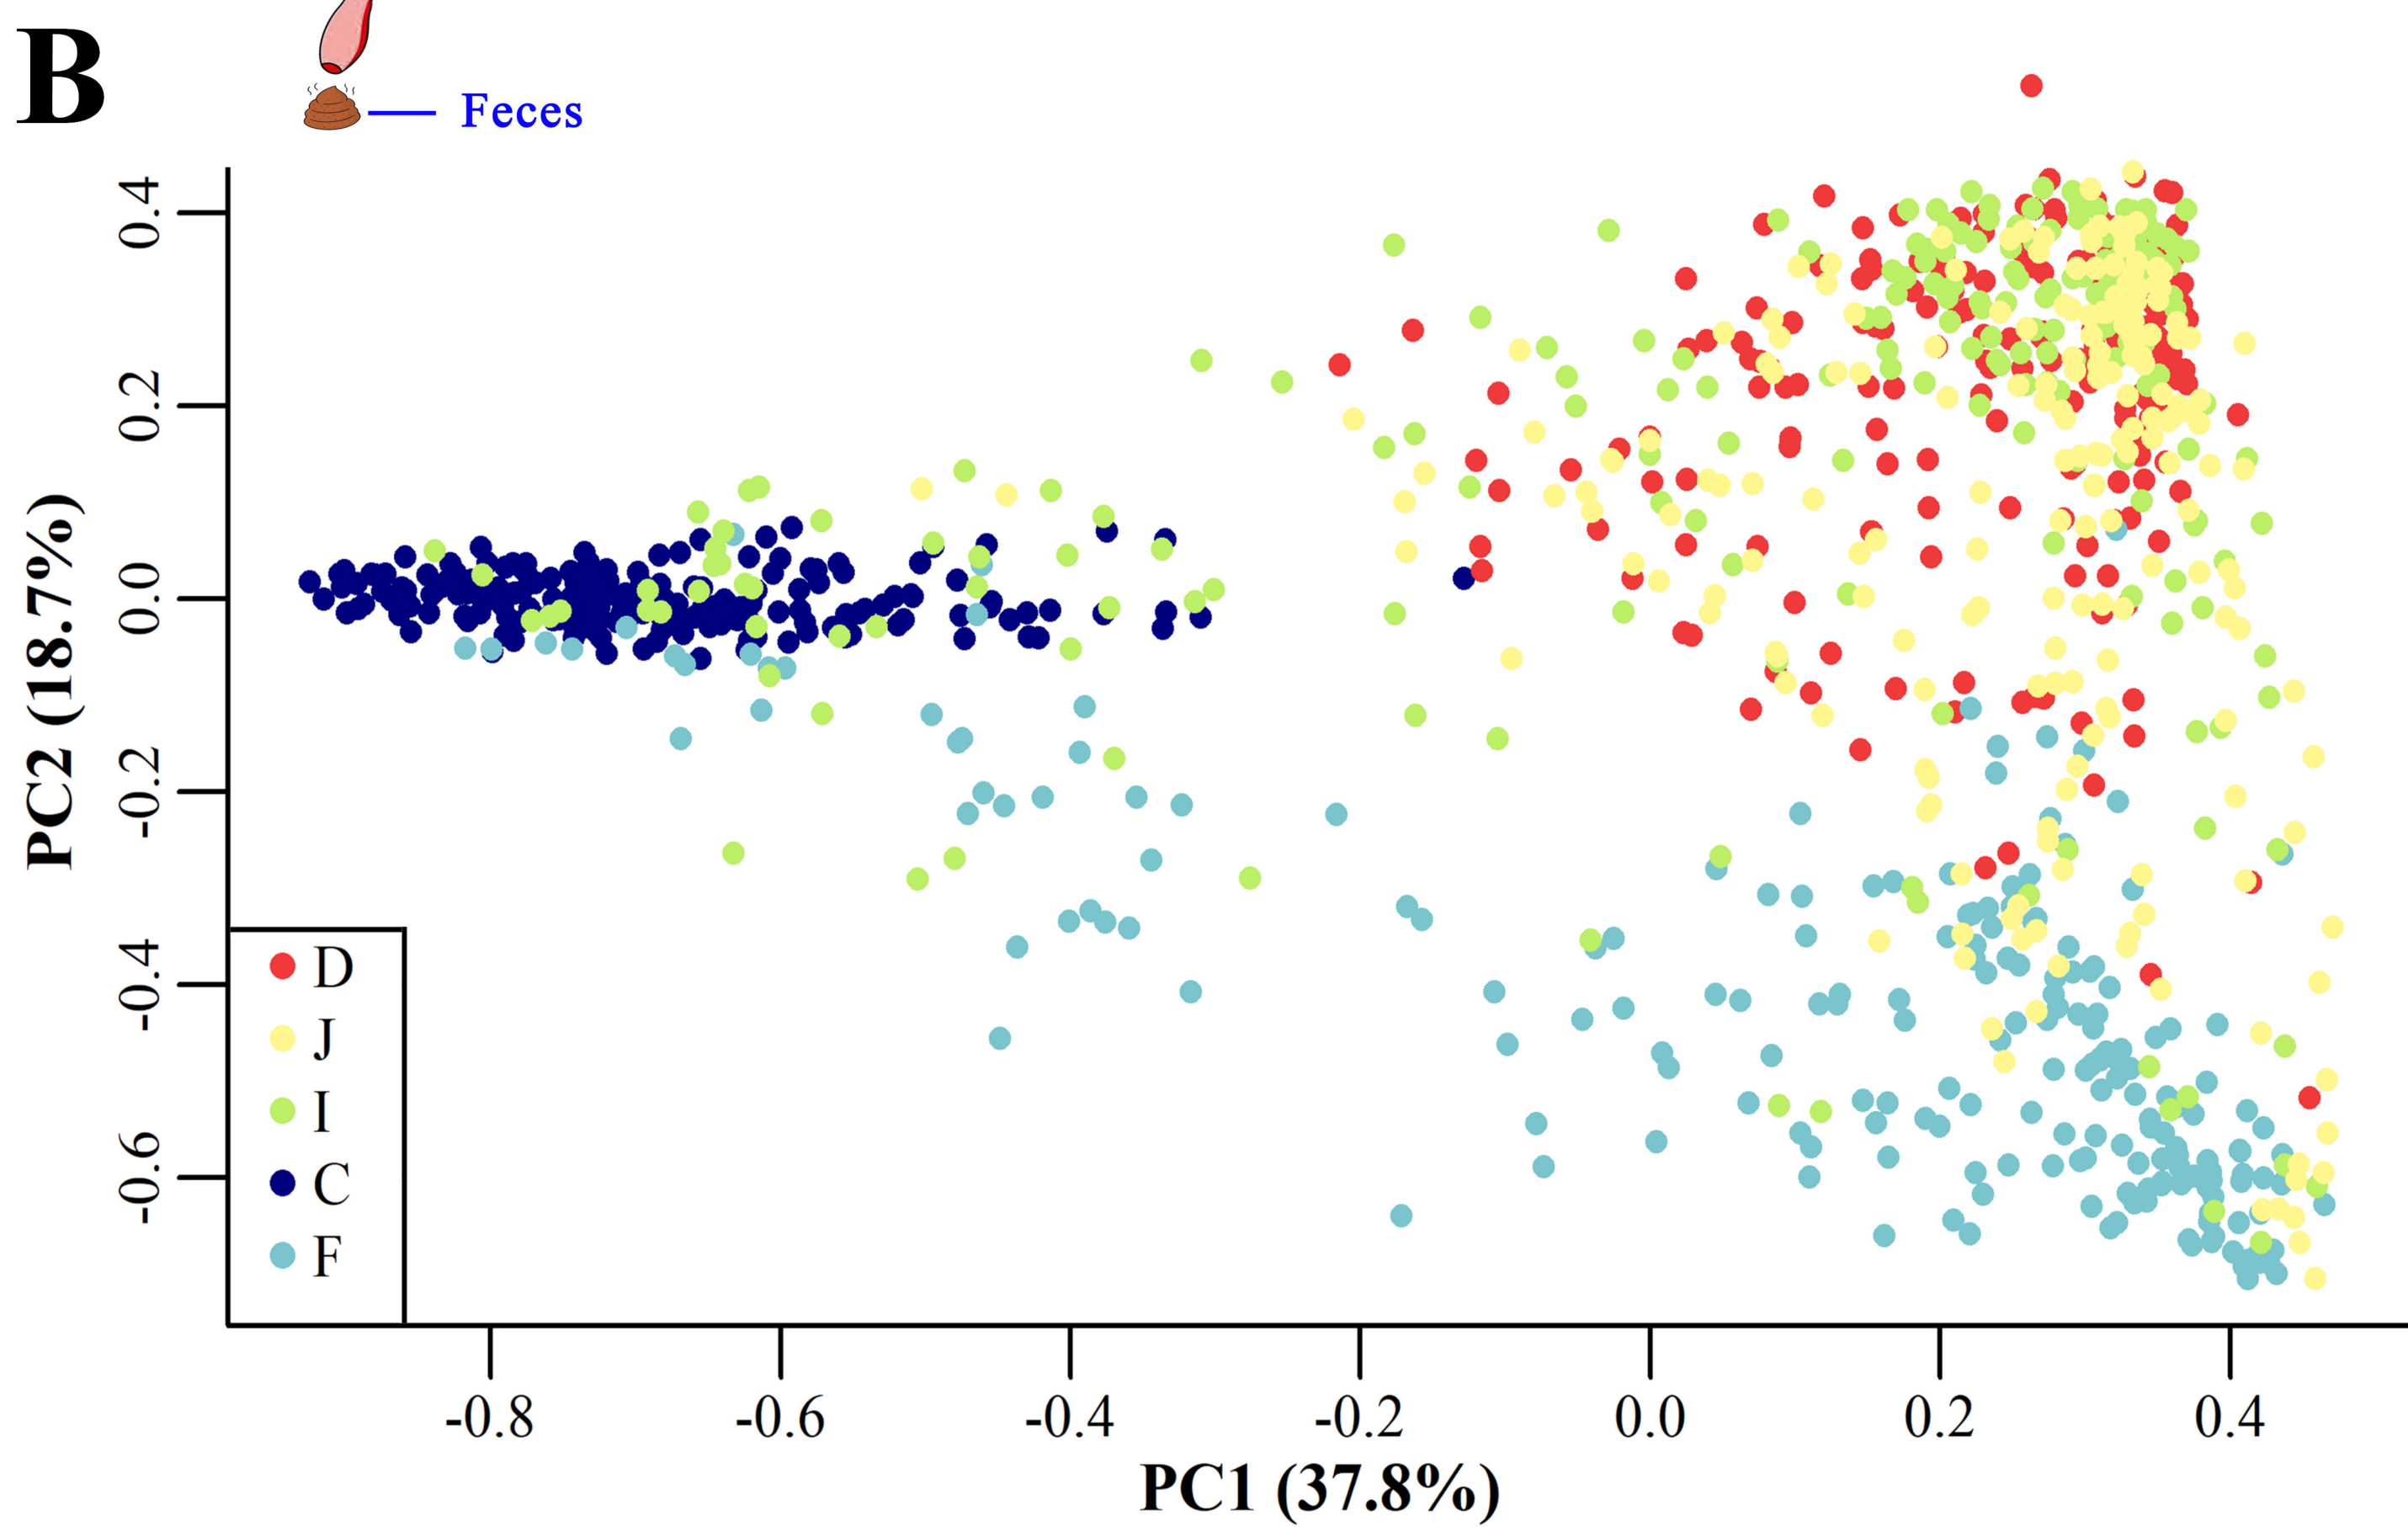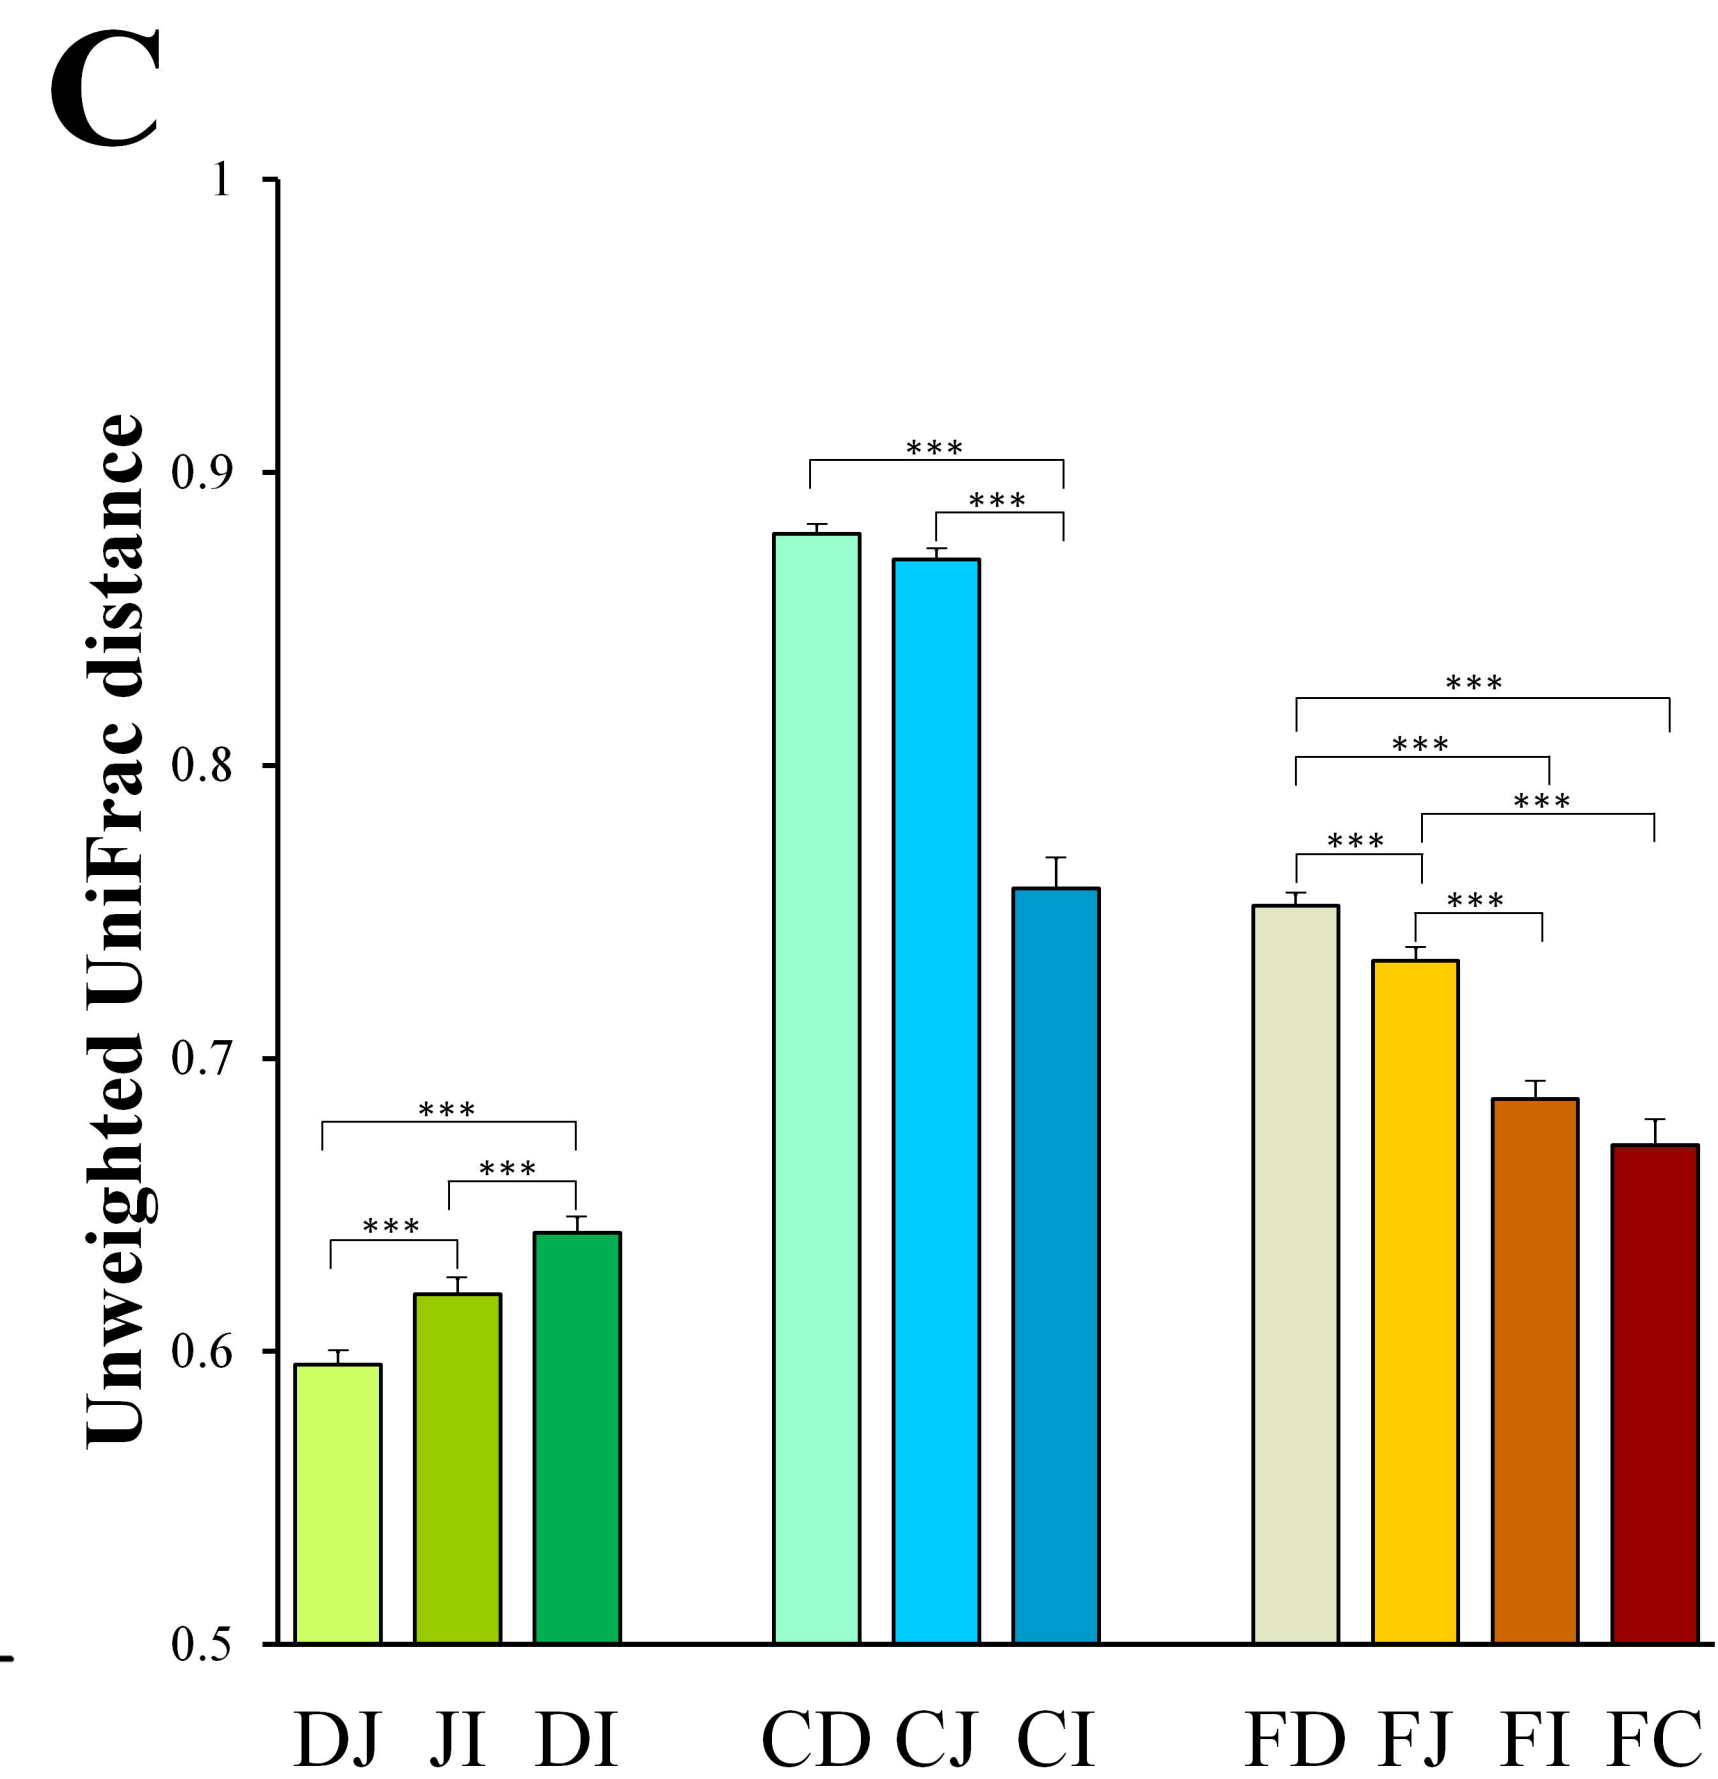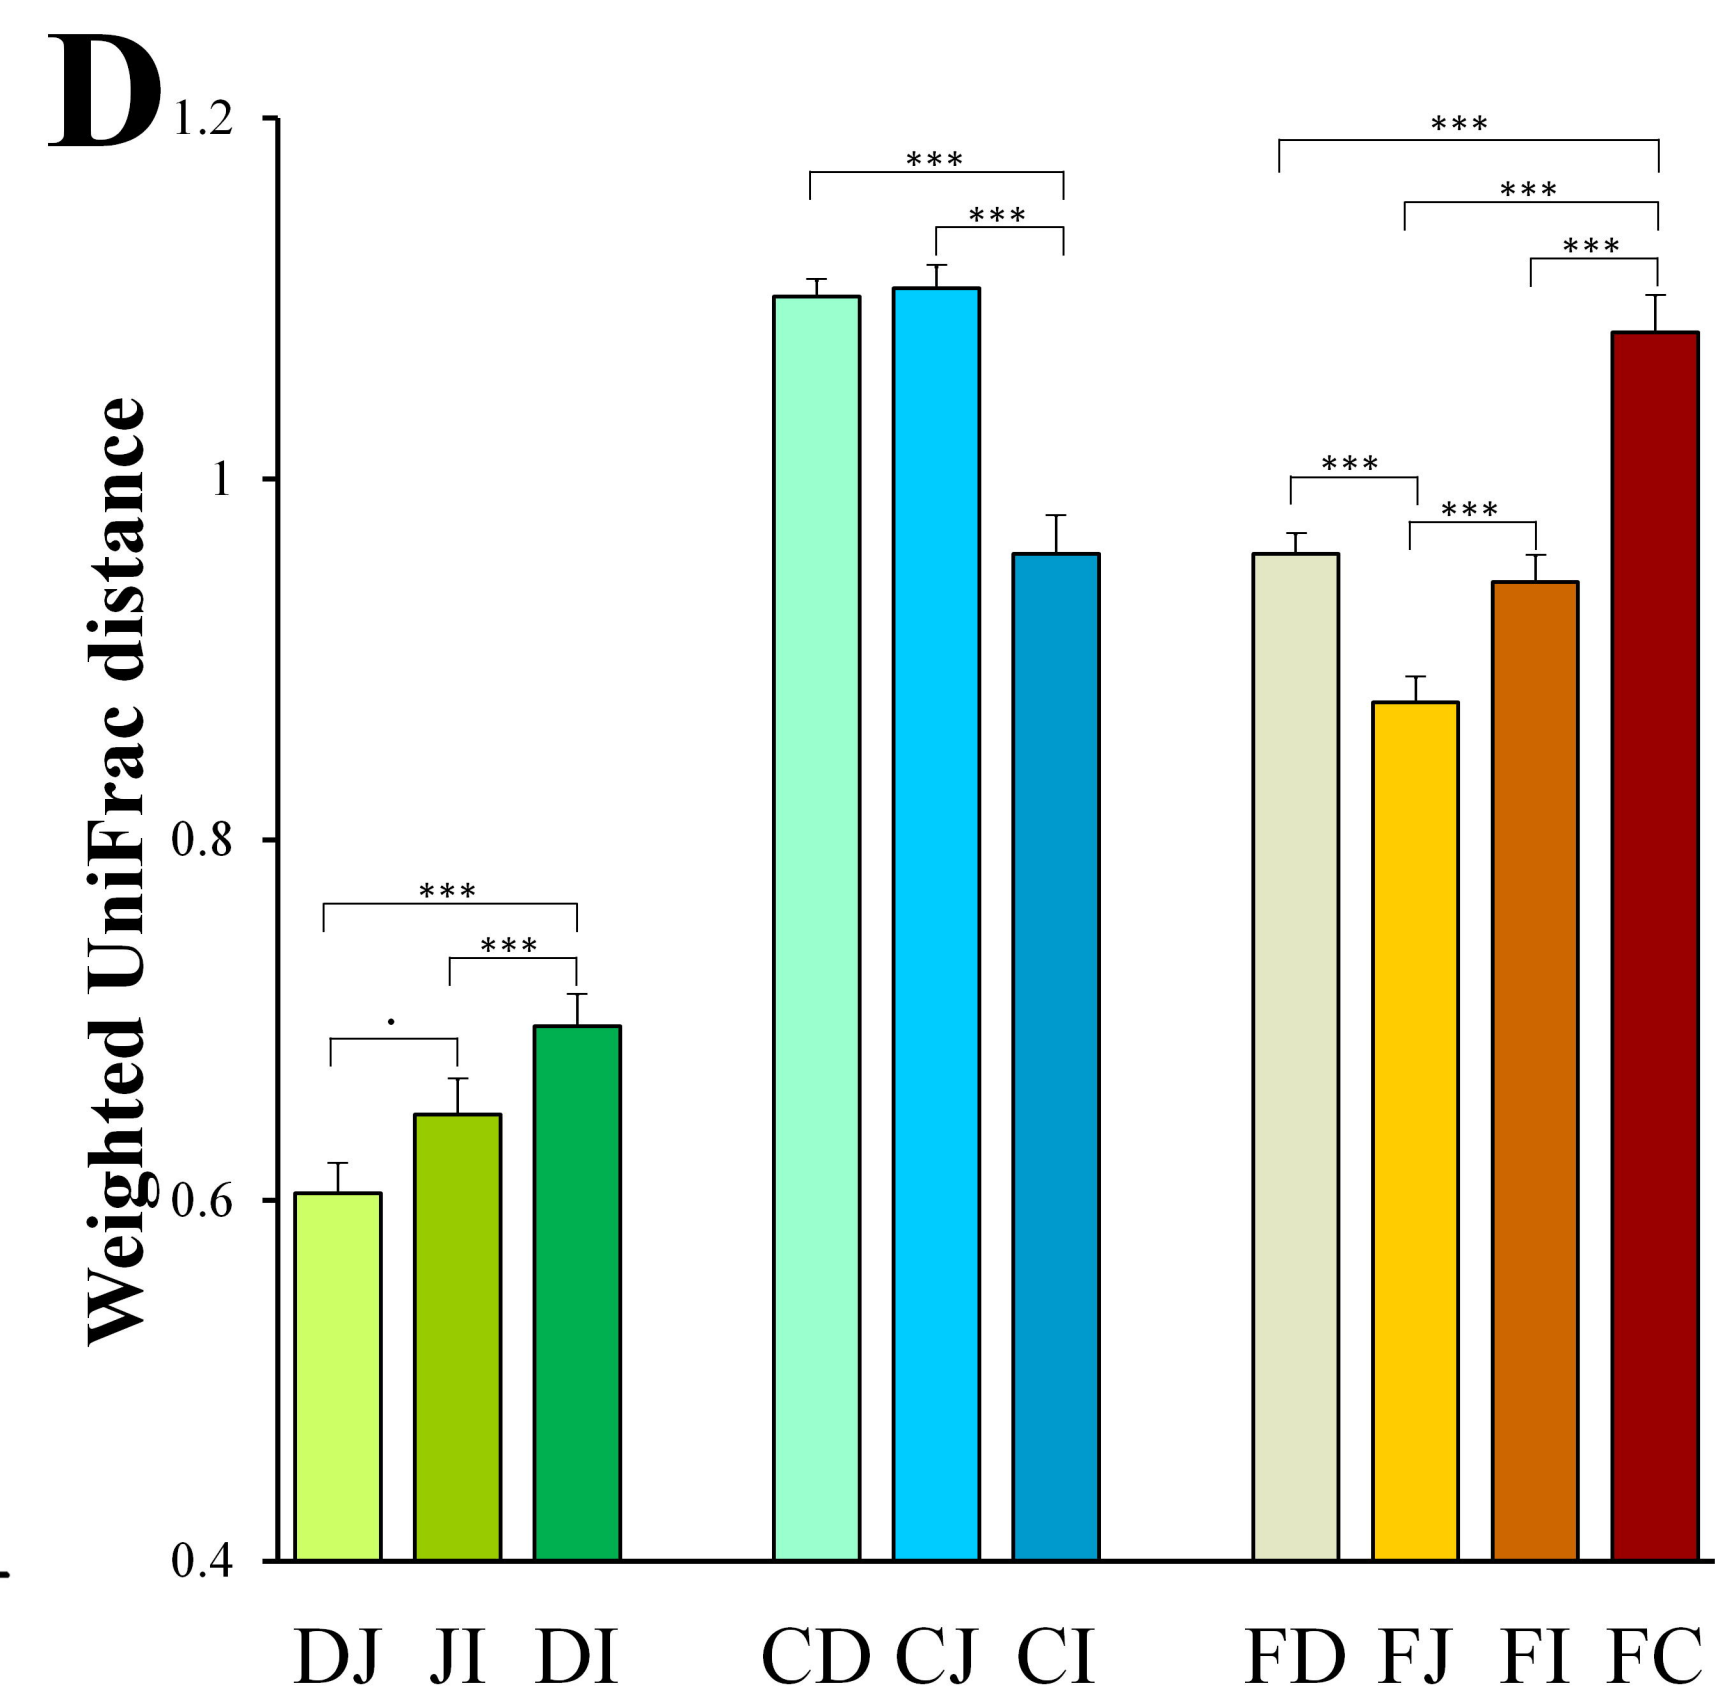

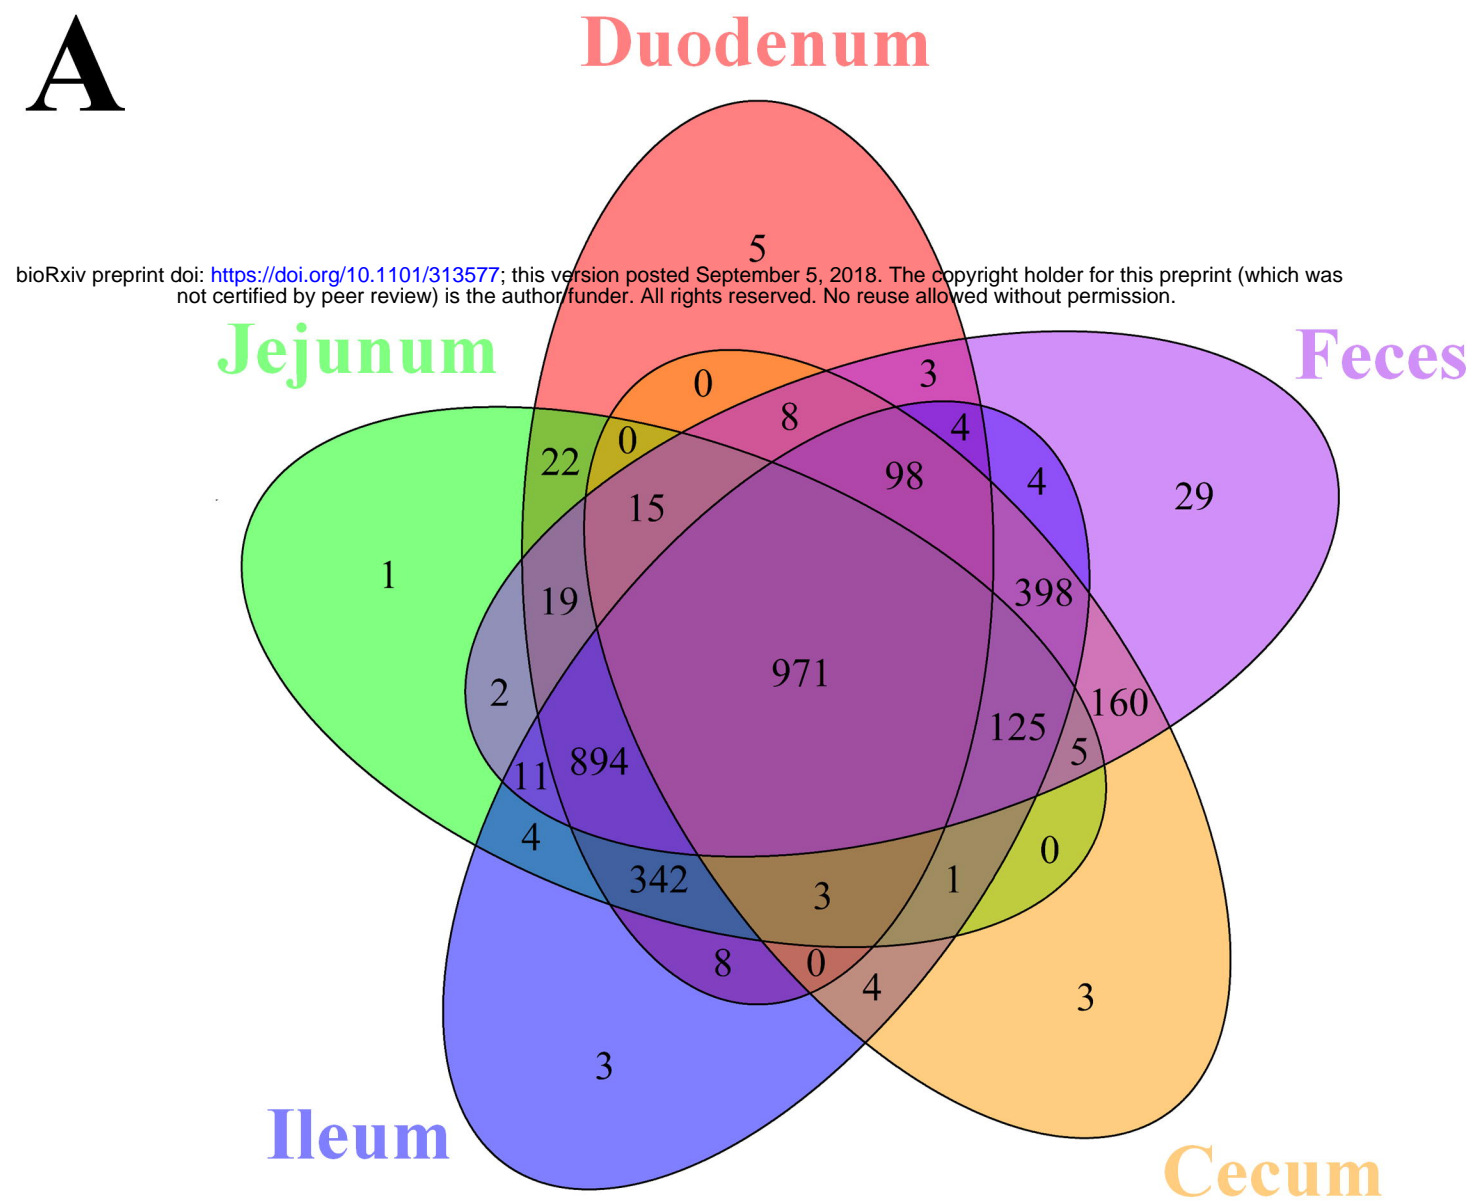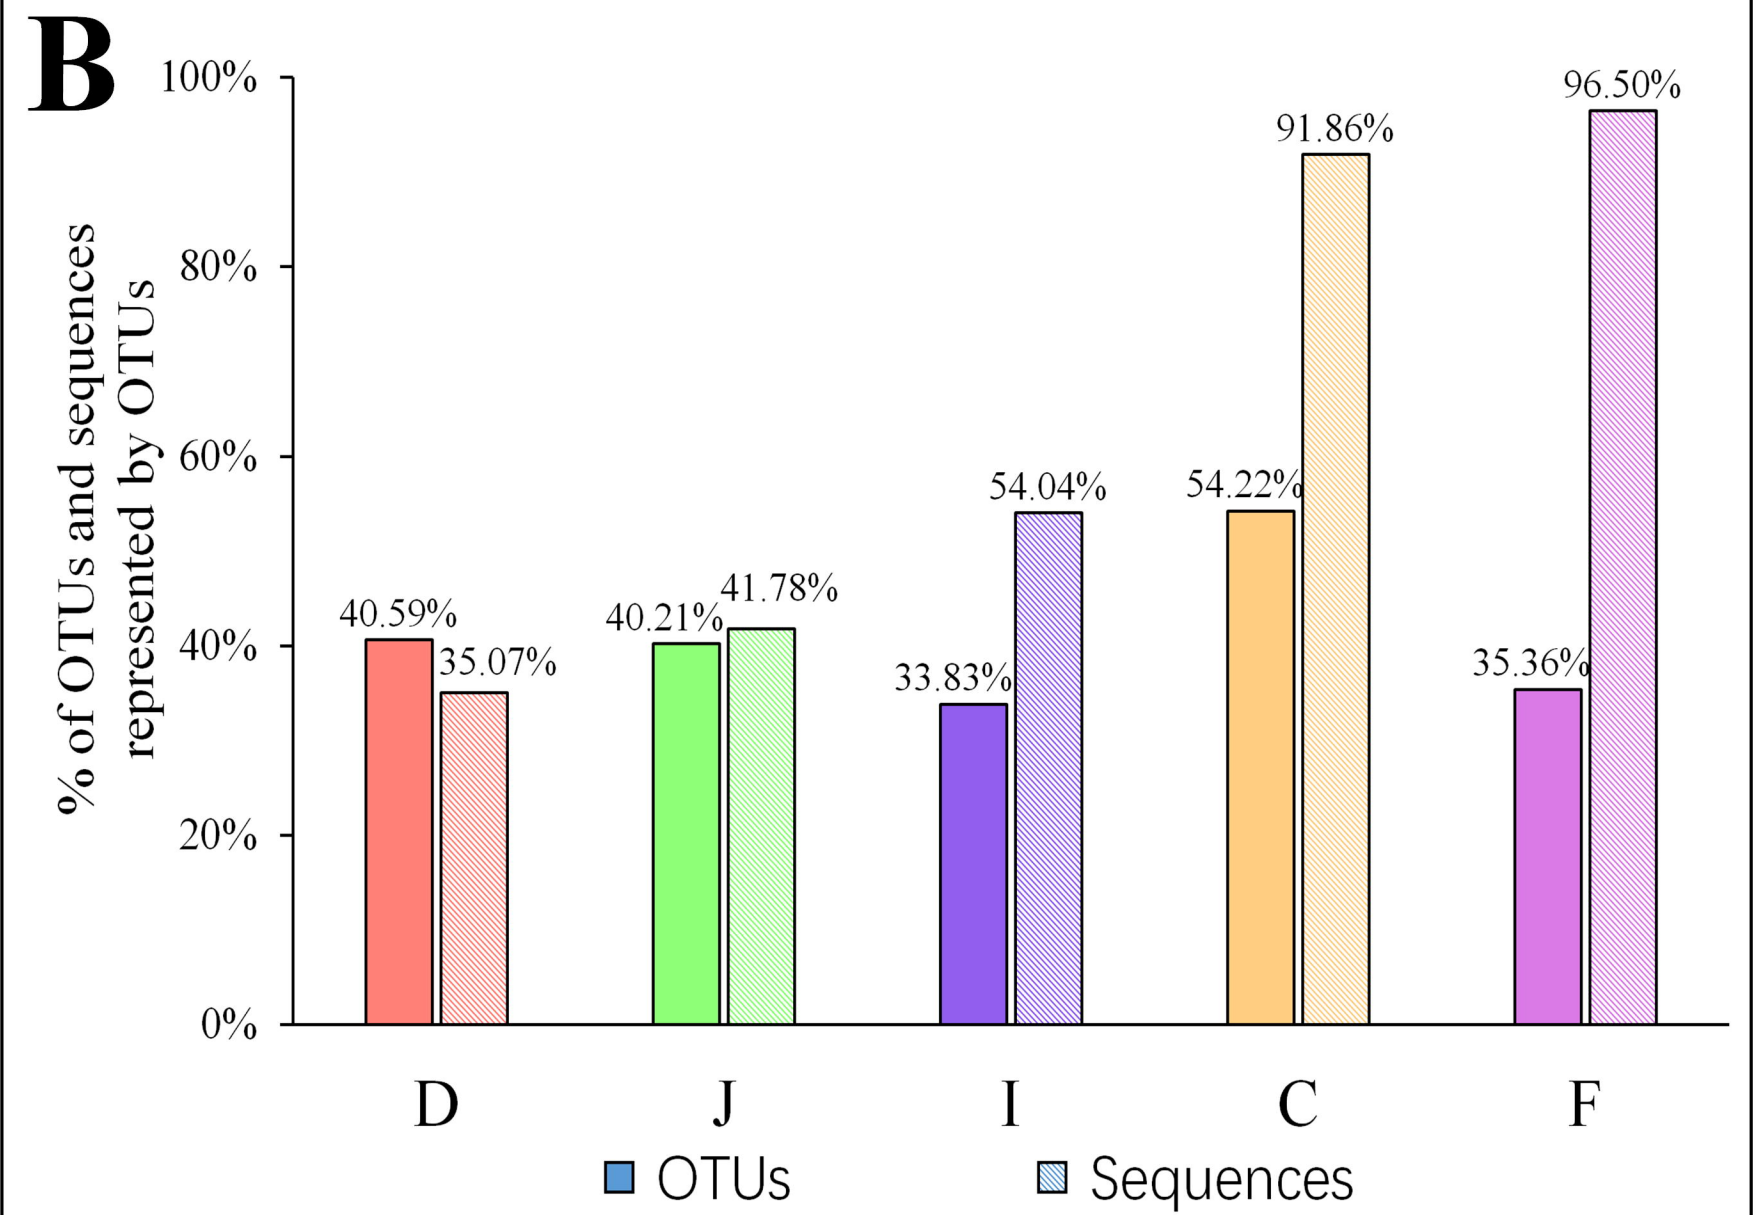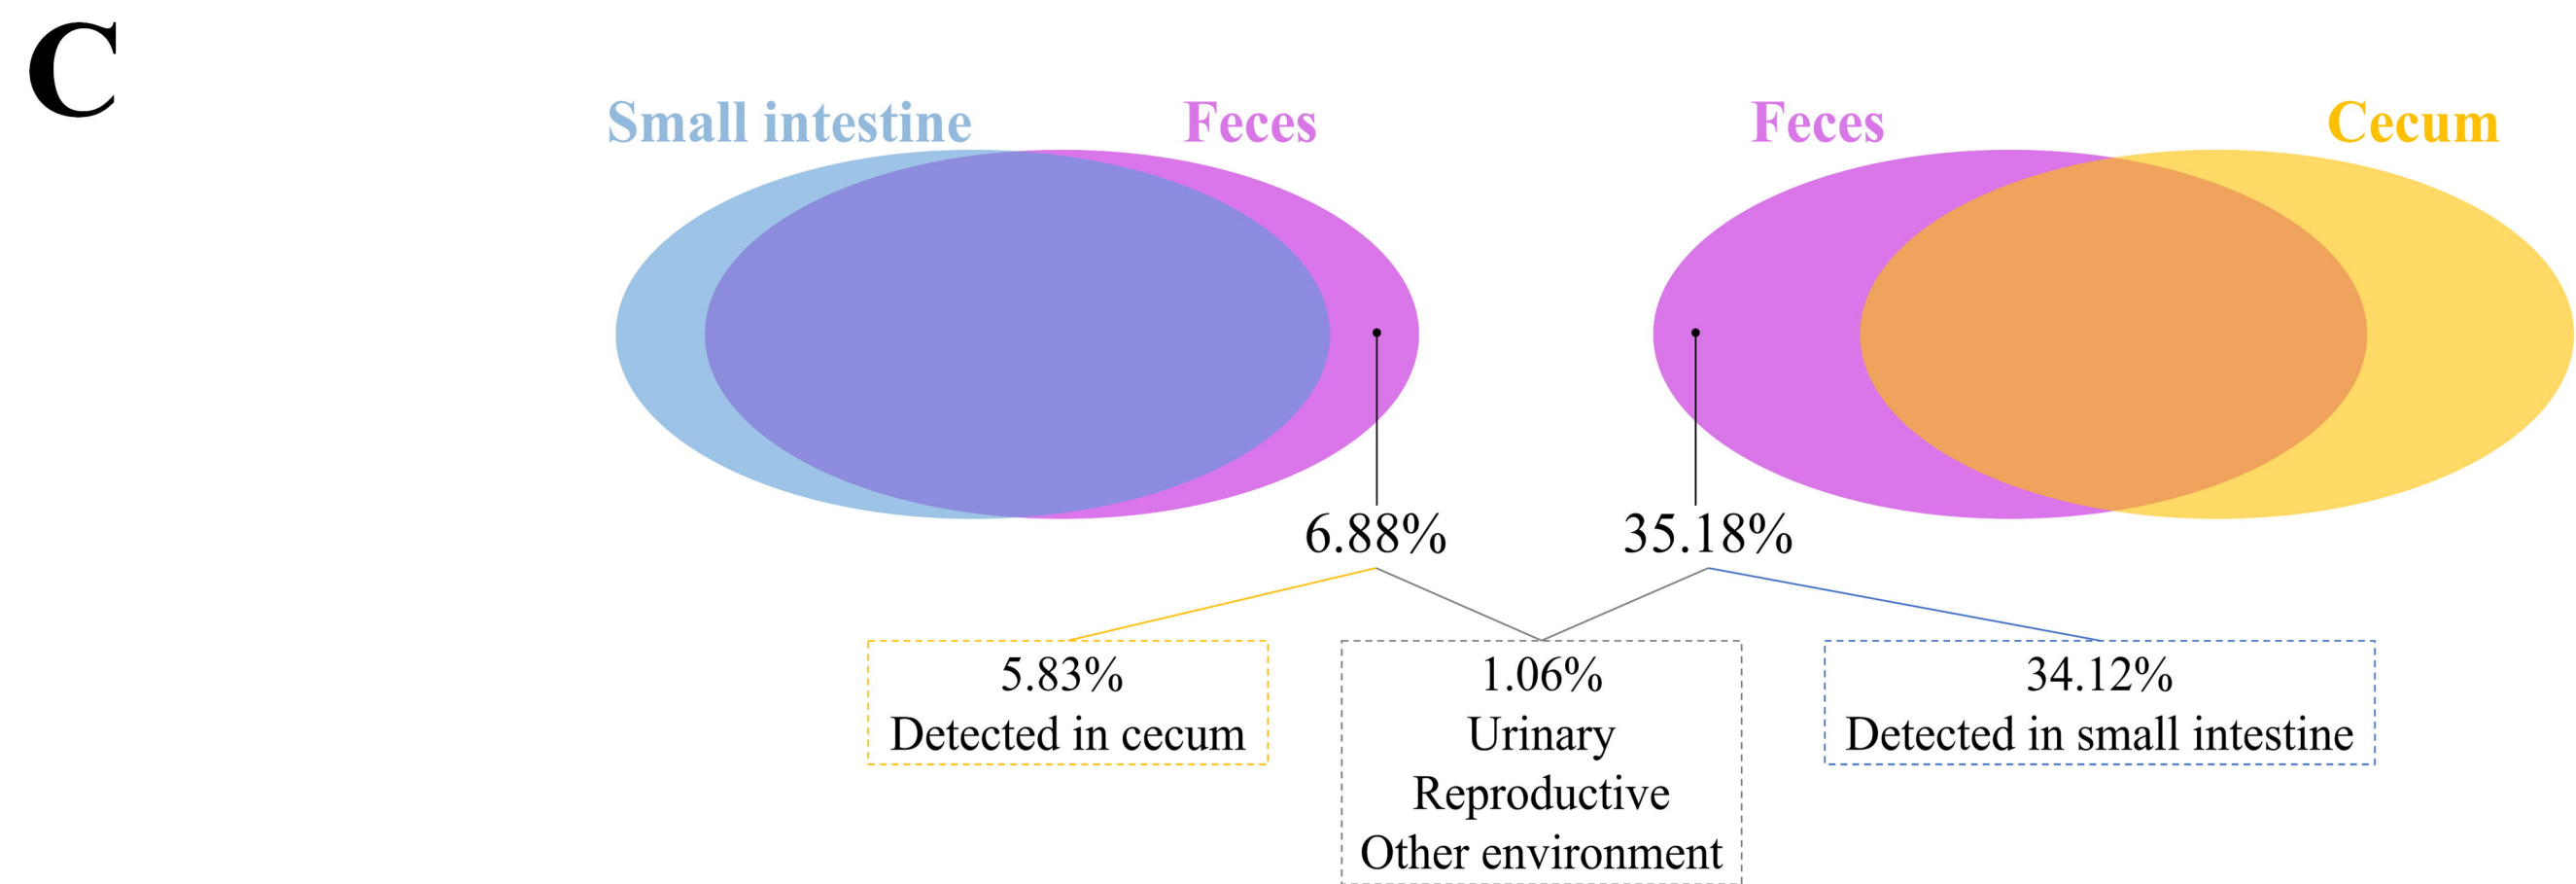



**$-\log_{10}(\text{relative abundance in GI tract})$**

bioRxiv preprint doi: <https://doi.org/10.1101/313577>; this version posted September 5, 2018. The copyright holder for this preprint (which was not certified by peer review) is the author/funder. All rights reserved. No reuse allowed without permission.

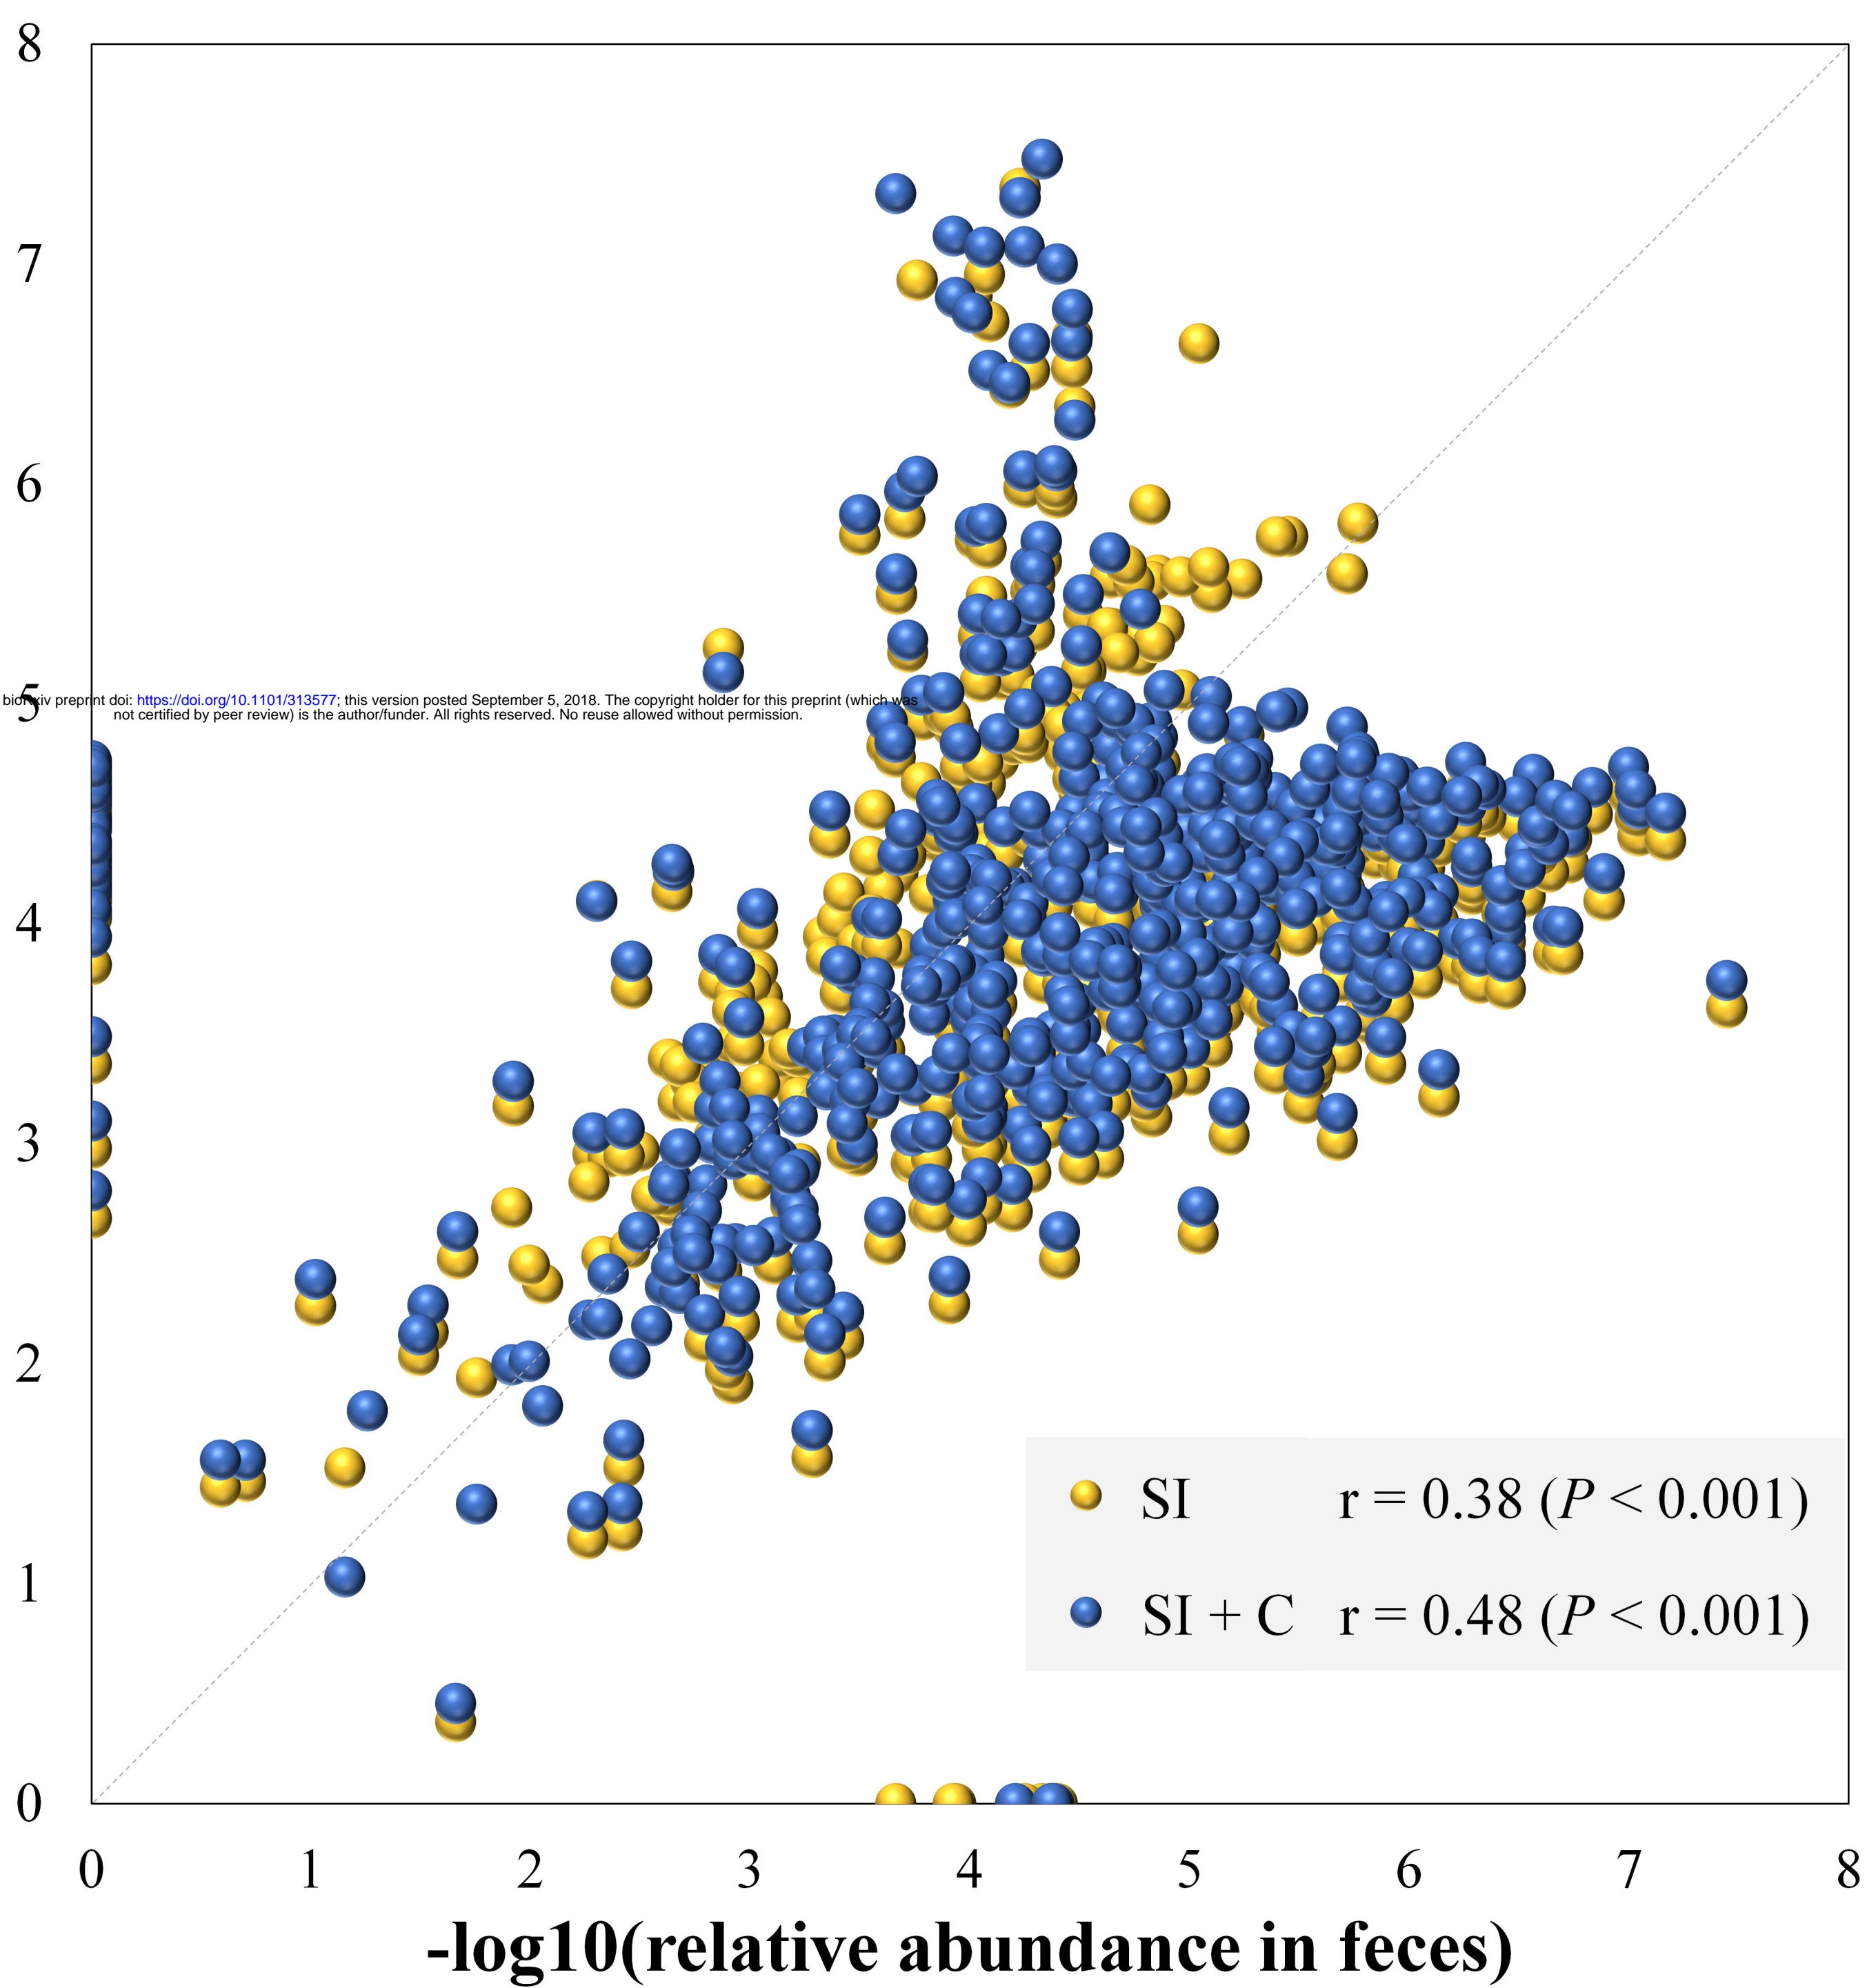

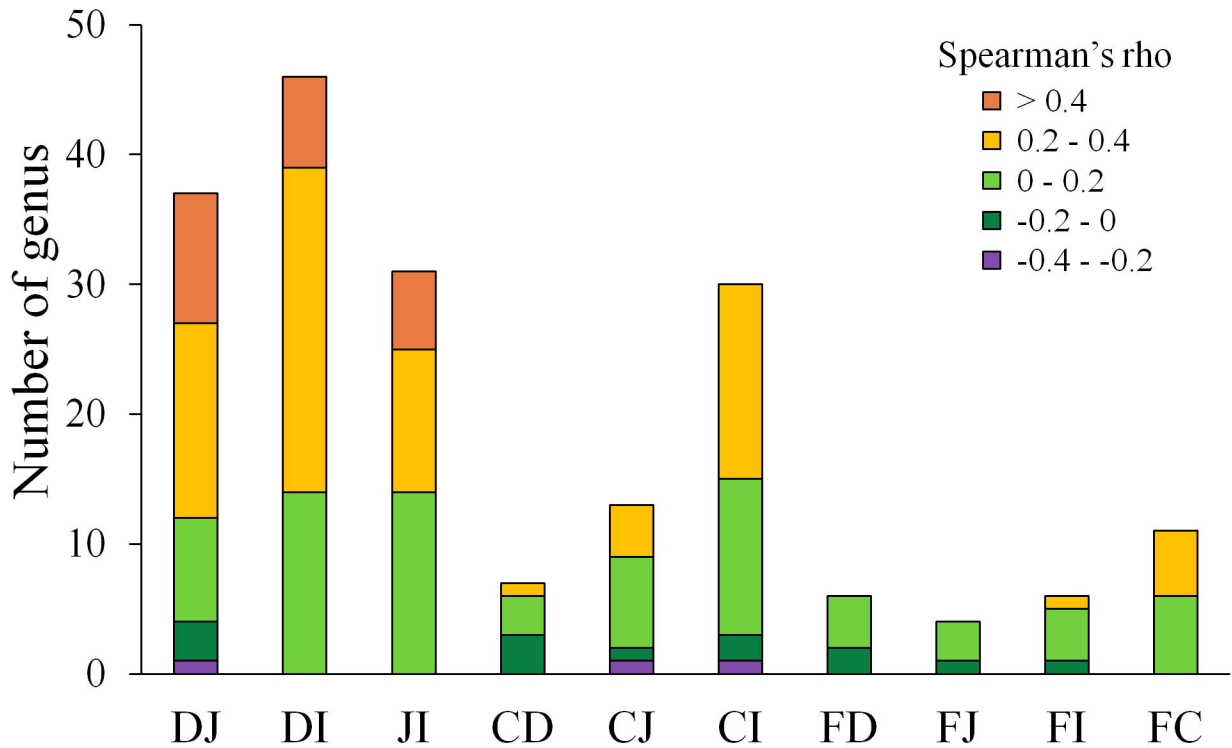

Source: https://www.biorxiv.org/content/10.1101/313577v2.full.pdf
